# Supplementary material for: Highly sensitive AIEE active fluorescent probe for detection of deferasirox: extensive experimental and theoretical studies
Source: Royal Society of Chemistry journal article supplement (doi:10.1039/d4ra03548h), 2024-01-01

## Supporting Information

### Highly Sensitive AIEE Active Fluorescent Probe for Detection of Deferasirox: Extensive Experimental and Theoretical Studies

Kainat Khurshid<sup>a</sup>, Sohail Anjum Shahzad<sup>a,\*</sup>, Mohammed A. Assiri<sup>b,c</sup>, Alam Shabbir<sup>a</sup>, Tayyeba Javid<sup>a</sup>, Hasher Irshad<sup>a</sup>

<sup>a</sup> Department of Chemistry, COMSATS University Islamabad, Abbottabad Campus, University Road, Abbottabad 22060, Pakistan

<sup>b</sup> Department of Chemistry, Faculty of Science, King Khalid University, P.O. Box 9004, Abha 61413, Saudi Arabia

<sup>c</sup> Research Center for Advanced Materials Science (RCAMS), King Khalid University, Abha 61514, P. O. Box 9004, Saudi Arabia

\* **Corresponding author:** Sohail Anjum Shahzad, Department of Chemistry, COMSATS University Islamabad, Abbottabad Campus, University Road, Abbottabad 22060, Pakistan.

**E-mail addresses:** [sashahzad@cuiatd.edu.pk](mailto:sashahzad@cuiatd.edu.pk) & [sohail\\_chem@yahoo.com](mailto:sohail_chem@yahoo.com) (S. A. Shahzad)

### Table of Contents

|                                                                                                                                              |   |
|----------------------------------------------------------------------------------------------------------------------------------------------|---|
| <b>SI-1. Instruments and reagents</b> .....                                                                                                  | 3 |
| <b>Fig. S 1.</b> Jobs plot of sensor <b>MPT</b> -DFX complex in H <sub>2</sub> O:THF (9:1, v/v).....                                         | 3 |
| <b>Fig. S 2.</b> The emission response of sensor <b>MPT</b> towards DFX before and after adding some common interferences.....               | 4 |
| <b>Fig. S 3.</b> Photostability test of probe <b>MPT</b> .....                                                                               | 4 |
| <b>Fig. S 4.</b> (a) Effect of pH and (b) Effect of temperature on the relative fluorescence quenching of sensor <b>MPT</b> towards DFX..... | 5 |

|                                                                                                                                                                                                                         |    |
|-------------------------------------------------------------------------------------------------------------------------------------------------------------------------------------------------------------------------|----|
| <b>Fig. S 5.</b> (a) Relative fluorescence quenching of <b>MPT</b> for DFX in the time interval of 8 – 48 hours and (b) Relative fluorescence quenching of <b>MPT</b> for DFX in the time interval of 10 – 60 sec. .... | 5  |
| <b>Fig. S 6.</b> UV-Vis. absorbance of <b>MPT</b> -DFX .....                                                                                                                                                            | 6  |
| <b>Fig. S 7.</b> UV-Vis absorbance and fluorescence emission of sensor <b>MPT</b> in THF solution (10 $\mu$ M) .....                                                                                                    | 6  |
| <b>Fig. S 8.</b> The absorbance of DFX and emission spectra of <b>MPT</b> .....                                                                                                                                         | 7  |
| <b>Fig. S 9.</b> Optimized geometries of sensor <b>MPT</b> (a) Site I <b>MPT</b> -DFX (b) Site II <b>MPT</b> -DFX (c) Site III <b>MPT</b> -DFX .....                                                                    | 7  |
| <b>Figure S 10.</b> Electron density difference image of <b>MPT</b> -DFX Complex.....                                                                                                                                   | 8  |
| <b>Fig. S 11.</b> Bright fluorescence of <b>MPT</b> (a) before adding DFX and, (b) after adding DFX .....                                                                                                               | 8  |
| <b>Fig. S 12.</b> (a) Fluorescence relative emission of sensor <b>MPT</b> in plasma and (b) Real water sample. ....                                                                                                     | 9  |
| Fig. S 12 Fluorescence quenching observed in spiked artificial urine samples.. <b>Error! Bookmark not defined.</b>                                                                                                      |    |
| <b>Table. S 1.</b> (a) The quantum yield of <b>MPT</b> in different water fractions and with DFX (b) Comparison of sensor <b>MPT</b> with already reported DFX sensors.....                                             | 10 |
| <b>Table. S 2.</b> QTAIM analysis of <b>MPT</b> -DFX .....                                                                                                                                                              | 11 |
| <b>Table. S 3.</b> Spike and recovery experiment for detection of DFX in plasma.....                                                                                                                                    | 11 |
| <b>Table. S 4.</b> Spike and recovery values for DFX detection in real water samples .....                                                                                                                              | 12 |
| <b>Table S 5.</b> Spike and recovery values for the detection of DFX in artificial urine samples .....                                                                                                                  | 13 |
| <b>References:</b> .....                                                                                                                                                                                                | 14 |
| <b>SI-2. NMR spectra of the synthesized compound</b> ..... <b>Error! Bookmark not defined.</b>                                                                                                                          |    |

### SI-1. Instruments and reagents

The sensor **MPT** was characterized by performing  $^1\text{H}$  NMR at 400 MHz,  $^{13}\text{C}$  NMR and DEPT-135 at 100 MHz with the help of Bruker Avance III NMR spectrometer employing  $\text{CDCl}_3$  as solvent and the reference compound was TMS (tetramethylsilane). NMR titration experiments were carried out in  $\text{CDCl}_3$ . The spectrofluorometer (FluoroMax-Plus-P-C, Horiba Jobin Yvon Technology, USA) was used to record the fluorescence emission spectra. The fluorescence studies were performed on solutions of sensor **MPT** in HPLC grade THF in order to detect the anticipated analyte. All chemicals and reagents, purchased from Daejung Chemicals & Metals (Korea), Oakwood Chemicals (USA), Sigma Aldrich (USA), and Alfa Aesar (UK), were employed directly without any further purification. Reagents and chemicals included diphenylacetic acid, potassium thiocyanate, 3,4 dimethoxyaniline, THF, dichloromethane, methanol, sodium bicarbonate, and distilled water. The plasma (P9523, MDL number: MFCD00131920) was purchased from Sigma Aldrich (USA).

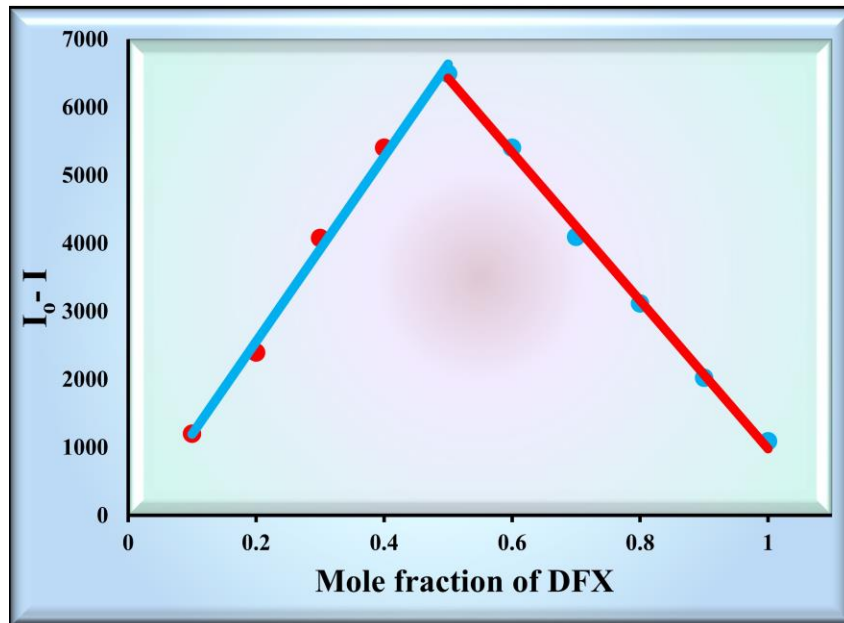

**Fig. S 1.** Jobs plot of sensor **MPT**-DFX complex in  $\text{H}_2\text{O}:\text{THF}$  (9:1, v/v)

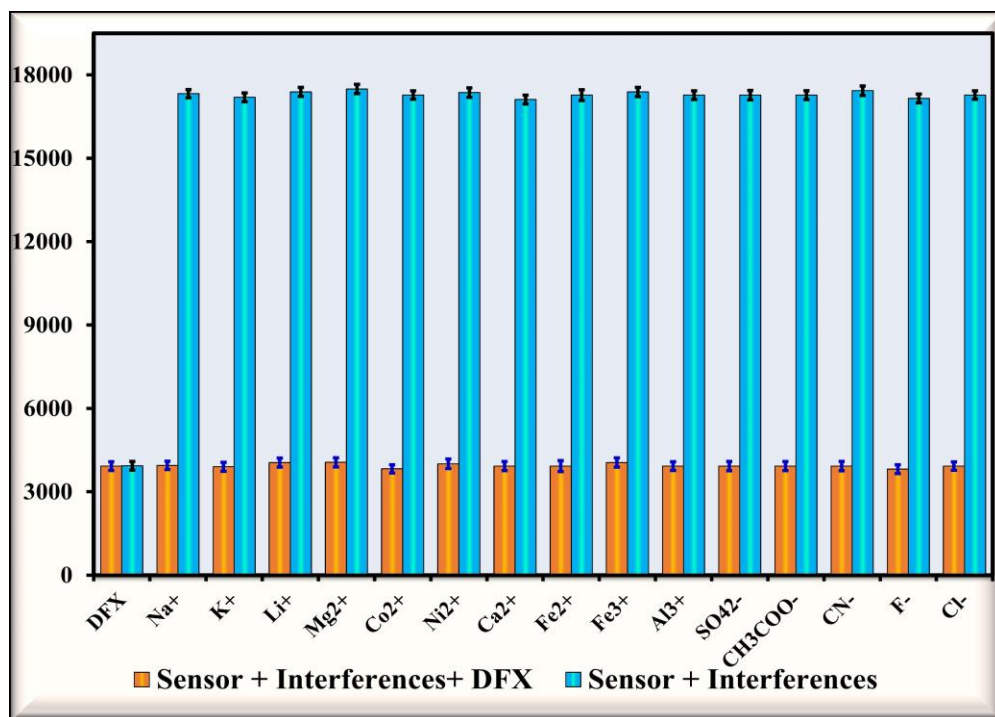

**Fig. S 2.** The emission response of sensor MPT towards DFX before and after adding some common interferences

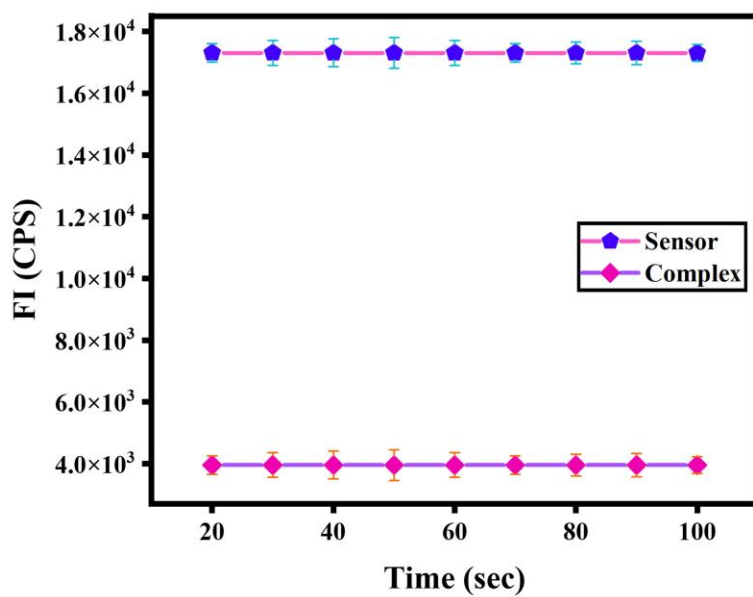

**Fig. S 3.** Photostability test of probe MPT

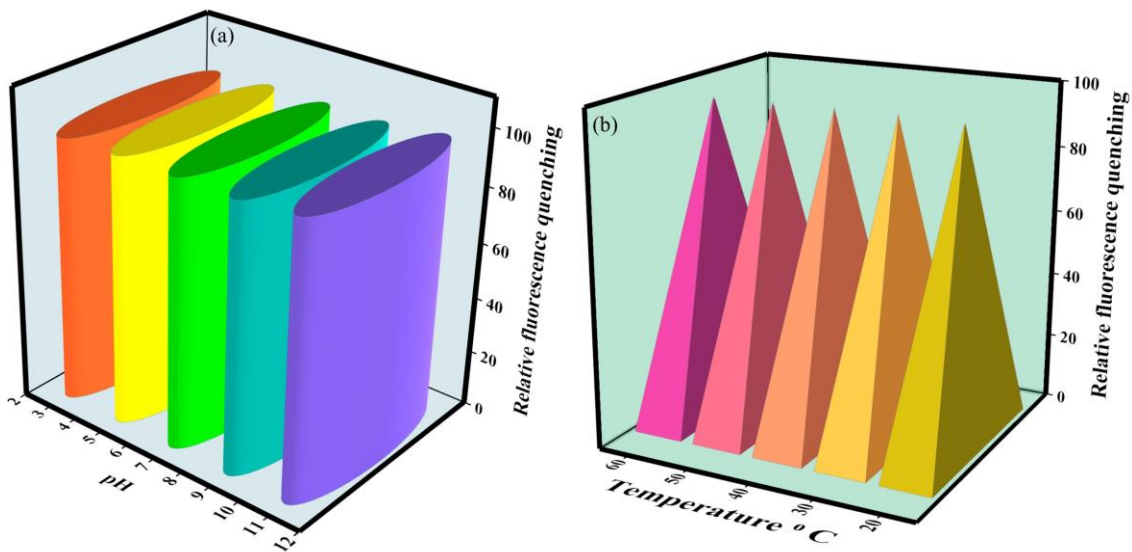

**Fig. S 4.** (a) Effect of pH and (b) Effect of temperature on the relative fluorescence quenching of sensor **MPT** towards DFX

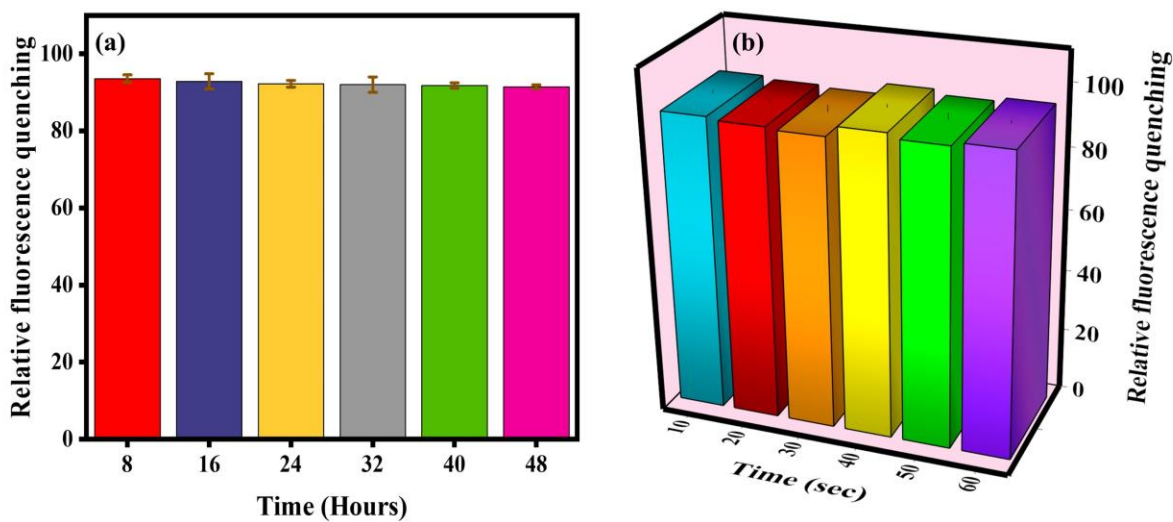

**Fig. S 5.** (a) Relative fluorescence quenching of **MPT** for DFX in the time interval of 8 – 48 hours and (b) Relative fluorescence quenching of **MPT** for DFX in the time interval of 10 – 60 sec.

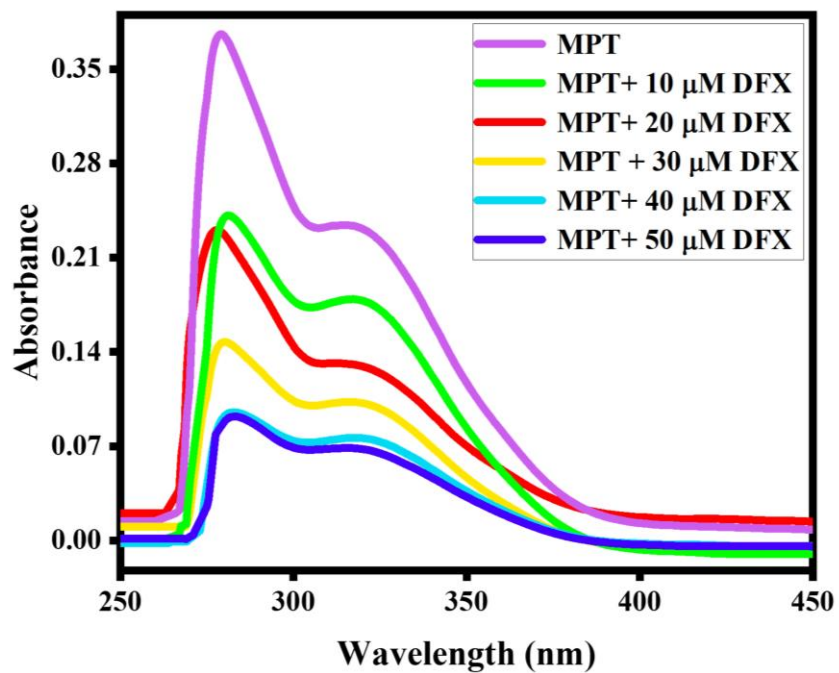

Fig. S 6. UV-Vis. absorbance of MPT-DFX

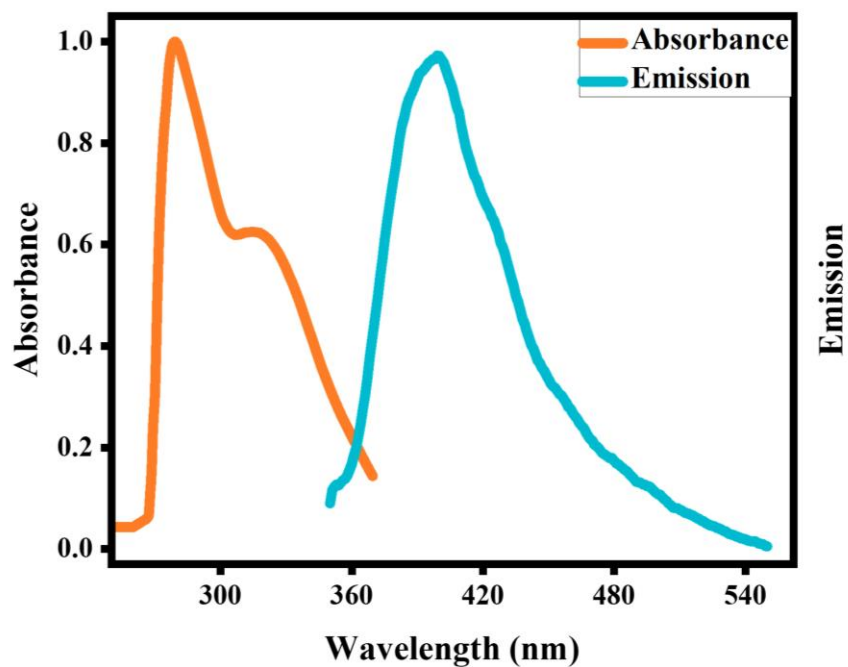

Fig. S 7. UV-Vis absorbance and fluorescence emission of sensor MPT in THF solution (10 μM)

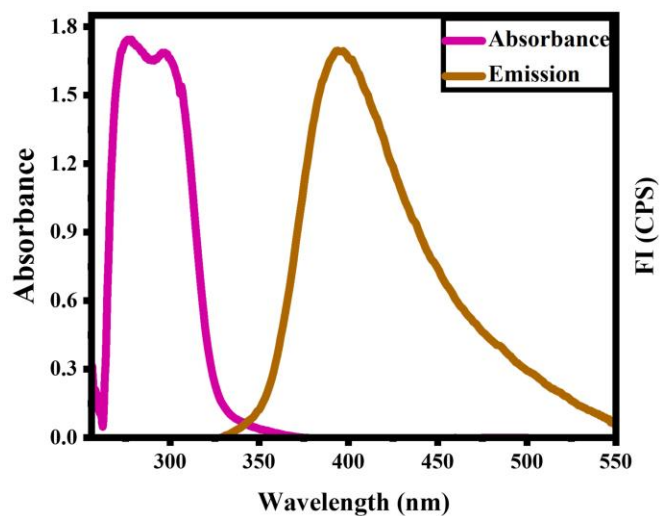

**Fig. S 8.** The absorbance of DFX and emission spectra of **MPT**

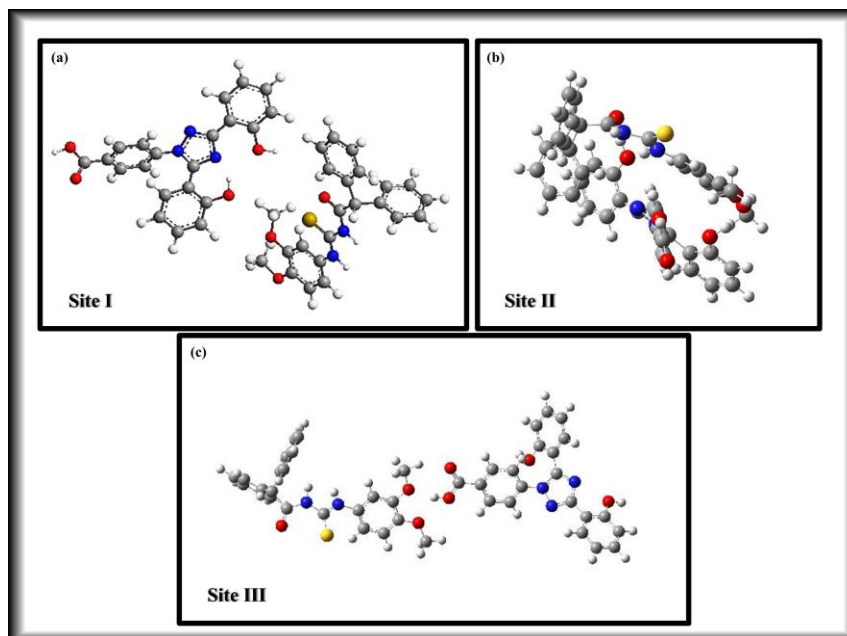

**Fig. S 9.** Optimized geometries of sensor **MPT** (a) Site I **MPT-DFX** (b) Site II **MPT-DFX** (c) Site III **MPT-DFX**

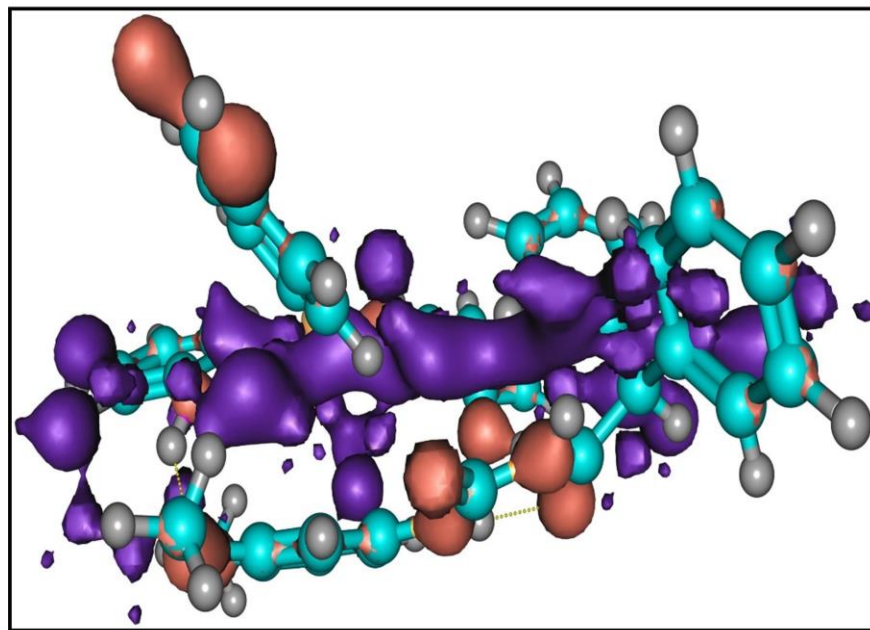

**Figure S 10.** Electron density difference image of **MPT-DFX** Complex

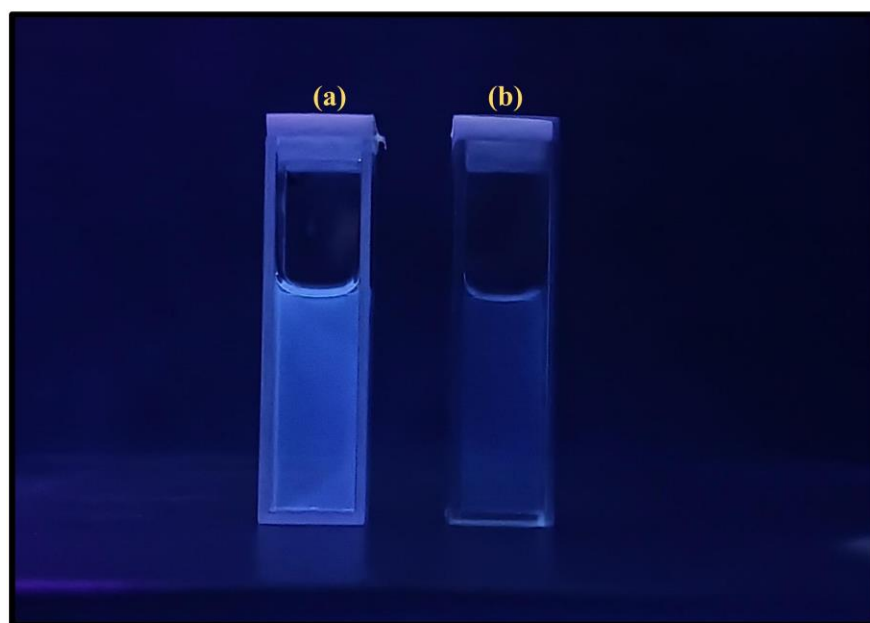

**Fig. S 11.** Bright fluorescence of **MPT** (a) before adding **DFX** and, (b) after adding **DFX**



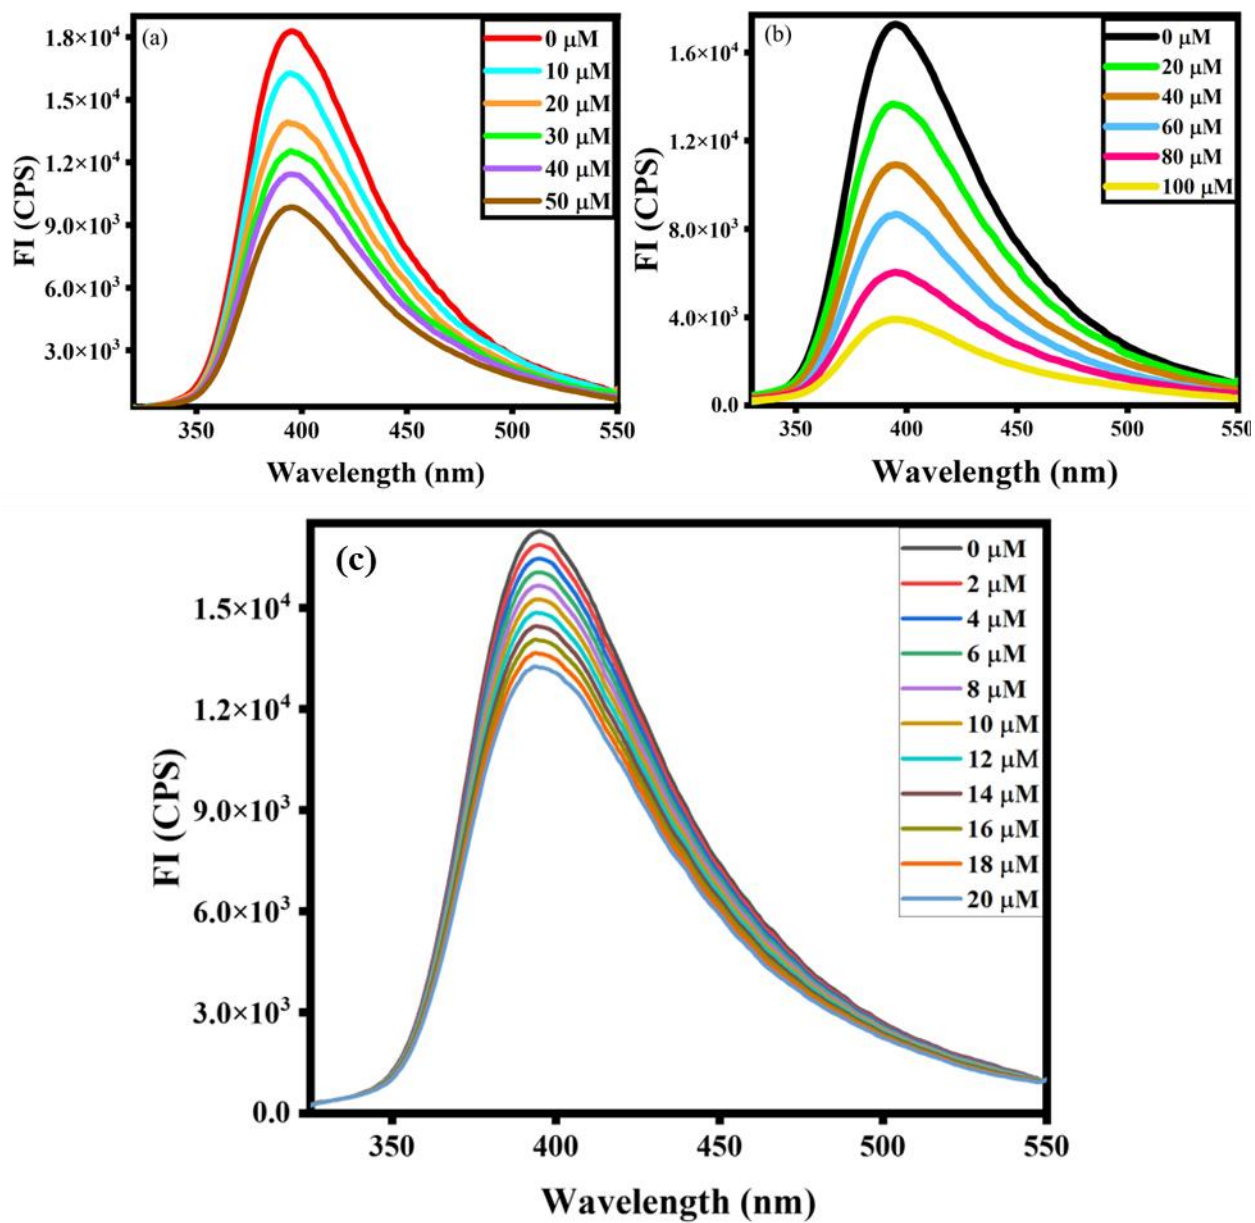

**Fig. S 12.** (a) Fluorescence relative emission of sensor MPT in plasma and (b) Real water sample (c) Fluorescence quenching observed in spiked artificial urine samples

**Table. S 1 (a).** The quantum yield of MPT in different water fractions and with DFX

| Water Fraction | Quantum Yield | DFX Concentration( $\mu\text{M}$ ) | Quantum Yield |
|----------------|---------------|------------------------------------|---------------|
| 10             | 0.075         | -                                  | -             |
| 20             | 0.086         | 10                                 | 0.137         |
| 30             | 0.098         | 20                                 | 0.112         |
| 40             | 0.11          | 30                                 | 0.091         |
| 50             | 0.117         | 40                                 | 0.075         |
| 60             | 0.123         | 50                                 | 0.061         |
| 70             | 0.128         | 60                                 | 0.05          |
| 80             | 0.134         | 70                                 | 0.042         |
| 90             | 0.137         | 80                                 | 0.037         |
| 95             | 0.092         | 90                                 | 0.034         |
| 99             | 0.078         | 100                                | 0.033         |

**Table. S 1 (b).** Comparison of sensor MPT with already reported DFX sensors

| Sensor                                                             | LOD                                           | Phenomenon             | Reference |
|--------------------------------------------------------------------|-----------------------------------------------|------------------------|-----------|
| <b>Carbamothioyl based sensor</b>                                  | 175 nM<br>(0.2 $\mu\text{M}$ )                | Fluorescence quenching | This work |
| <b>Carbon dots probe and <math>\text{Cu}^{2+}</math> as medium</b> | 0.33 $\mu\text{g/mL}$<br>(330 $\mu\text{M}$ ) | Fluorescence quenching | [1]       |
| <b>Dopamine-conjugated carbon dots</b>                             | 600 ng/mL<br>(600 $\mu\text{M}$ )             | Fluorescence quenching | [2]       |

|                                                                                         |                        |                          |     |
|-----------------------------------------------------------------------------------------|------------------------|--------------------------|-----|
| <b>Carbon dots and Cu<sup>2+</sup>-catalyzed oxidation of <i>o</i>-phenylenediamine</b> | 0.38 mg/mL<br>(0.38 M) | Fluorescence quenching   | [3] |
| <b>“ON-OFF-ON” sensor for sequential detection of Fe<sup>3+</sup> and deferasirox</b>   | 0.14 ppm               | Fluorescence enhancement | [4] |
| <b>Poly(Allylaminehydrochloride)-Templated Copper Nanoclusters</b>                      | 0.1 µg/mL              | Fluorescence quenching   | [5] |

**Table. S 2.** Spike and recovery experiment for detection of DFX in plasma

| Spiked (µM) | Recovered (µM) | Recovery (%) | RSD (%) |
|-------------|----------------|--------------|---------|
| 10          | 10.4           | 104          | 1.21    |
| 20          | 19.7           | 98.5         | 1.18    |
| 30          | 30.6           | 102          | 1.26    |
| 40          | 41.4           | 103.5        | 1.2     |
| 50          | 51.8           | 103.6        | 1.29    |

**Table. S 3.** QTAIM analysis of **MPT-DFX**

| BCPs     | MPT-DFX | $\rho(\mathbf{r})$<br>(a.u) | $\nabla^2\rho(\mathbf{r})$<br>(a.u) | $G(\mathbf{r})$<br>(a.u) | $V(\mathbf{r})$<br>(a.u) | $H(\mathbf{r})$<br>(a.u) | $-V/G$ | $E_{int}$<br>(kcal/mol) |
|----------|---------|-----------------------------|-------------------------------------|--------------------------|--------------------------|--------------------------|--------|-------------------------|
| <b>1</b> | S...H   | 0.005                       | 0.017                               | 0.003                    | -0.002                   | -0.00106                 | 0.68   | -0.722                  |

|    |        |       |       |       |        |          |      |        |
|----|--------|-------|-------|-------|--------|----------|------|--------|
| 2  | S... H | 0.006 | 0.020 | 0.004 | -0.003 | 0.00108  | 0.72 | -0.878 |
| 3  | H...C  | 0.004 | 0.011 | 0.002 | -0.001 | -0.00058 | 0.50 | -0.314 |
| 4  | O...H  | 0.025 | 0.076 | 0.020 | -0.021 | -0.00108 | 1.05 | -6.589 |
| 5  | C...H  | 0.006 | 0.021 | 0.004 | -0.003 | -0.00112 | 0.75 | -0.941 |
| 6  | O...O  | 0.010 | 0.046 | 0.010 | -0.009 | -0.00132 | 0.90 | -2.823 |
| 7  | C...N  | 0.004 | 0.012 | 0.002 | -0.002 | -0.00049 | 1.00 | -0.628 |
| 8  | O...H  | 0.028 | 0.094 | 0.023 | -0.023 | -0.00003 | 1.00 | -7.216 |
| 9  | H...O  | 0.013 | 0.042 | 0.010 | -0.009 | -0.00052 | 0.90 | -2.824 |
| 10 | C...O  | 0.009 | 0.028 | 0.006 | -0.005 | -0.00081 | 0.83 | -1.569 |
| 11 | C...N  | 0.004 | 0.011 | 0.002 | -0.002 | -0.00050 | 1.00 | -0.628 |
| 12 | N...H  | 0.006 | 0.020 | 0.004 | -0.003 | -0.00089 | 0.75 | -0.941 |
| 13 | C...H  | 0.007 | 0.021 | 0.004 | -0.003 | -0.00099 | 0.75 | -0.941 |
| 14 | C...C  | 0.006 | 0.019 | 0.004 | -0.003 | -0.00093 | 0.75 | -0.941 |

**Table. S 4.** Spike and recovery values for DFX detection in real water samples

| Spiked ( $\mu\text{M}$ ) | Recovered ( $\mu\text{M}$ ) | Recovery (%) | RSD (%) |
|--------------------------|-----------------------------|--------------|---------|
| 20                       | 19.8                        | 99           | 1.24    |
| 40                       | 40.5                        | 101.3        | 1.2     |
| 60                       | 60.9                        | 101.5        | 1.32    |

|     |       |       |      |
|-----|-------|-------|------|
| 80  | 81.3  | 101.6 | 1.29 |
| 100 | 102   | 102   | 1.17 |
| 120 | 121.2 | 101   | 1.19 |

**Table S 5.** Spike and recovery values for the detection of DFX in artificial urine samples

| <b>Spiked (<math>\mu\text{M}</math>)</b> | <b>Recovered (<math>\mu\text{M}</math>)</b> | <b>Recovery (%)</b> | <b>RSD (%)</b> |
|------------------------------------------|---------------------------------------------|---------------------|----------------|
| 2                                        | 1.99                                        | 99.5                | 0.52           |
| 4                                        | 3.96                                        | 99                  | 0.45           |
| 6                                        | 5.87                                        | 97.8                | 0.4            |
| 8                                        | 7.93                                        | 99                  | 0.35           |
| 10                                       | 9.48                                        | 94.8                | 0.32           |
| 12                                       | 11.79                                       | 98                  | 0.29           |
| 14                                       | 13.92                                       | 99                  | 0.28           |
| 16                                       | 15.89                                       | 99                  | 0.3            |
| 18                                       | 17.9                                        | 99                  | 0.35           |
| 20                                       | 19.73                                       | 98                  | 0.4            |

## References:

- [1] W. Han, C. Miao, X. Zhang, Y. Lin, X. Hao, Z. Huang, S. Weng, X. Lin, X. Guo, J. Huang, A signal-off fluorescent strategy for deferasirox effective detection using carbon dots as probe and  $\text{Cu}^{2+}$  as medium, *Anal. Chim. Acta*, 1179 (2021) 338853, <https://doi.org/10.1016/j.aca.2021.338853>.
- [2] C.-C. Wang, P.-T. Huang, H.-S. Kou, S.-M. Wu,  $\text{Cu}^{2+}$ -induced quenching and recovery of the luminescence of dopamine-conjugated carbon dots for sensing deferasirox in plasma, *Sens. Actuators B Chem.*, 311 (2020) 127916, <https://doi.org/10.1016/j.snb.2020.127916>.
- [3] C.-F. Miao, X.-Z. Guo, X.-T. Zhang, Y.-N. Lin, W.-D. Han, Z.-J. Huang, S.-H. Weng, Ratiometric fluorescence assay based on carbon dots and  $\text{Cu}^{2+}$ -catalyzed oxidation of O-phenylenediamine for the effective detection of deferasirox, *RSC Adv.*, 11(55) (2021) 34525-34532, <https://doi.org/10.1039/D1RA07078A>.
- [4] A.Y.A. Alzahrani, K.O. Khan, S. Rafique, H. Irshad, A.M. Khan, S.A. Shahzad, Theoretical and experimental studies on mechanochromic triphenylamine based fluorescent “ON-OFF-ON” sensor for sequential detection of  $\text{Fe}^{3+}$  and deferasirox, *Spectrochim. Acta A Mol. Biomol. Spectrosc.*, 297 (2023) 122745, <https://doi.org/10.1016/j.saa.2023.122745>.
- [5] H.-J. Lin, C.-C. Wang, H.-S. Kou, C.-W. Cheng, S.-M. Wu, Stable Luminescent Poly (Allylaminehydrochloride)-Templated Copper Nanoclusters for Selectively Turn-Off Sensing of Deferasirox in  $\beta$ -Thalassemia Plasma, *Pharmaceuticals*, 14(12) (2021) 1314, <https://doi.org/10.3390/ph14121314>.

# SI-2. NMR spectra of the synthesized compound

MPT (1H-NMR, CDCl3, 400 MHz)

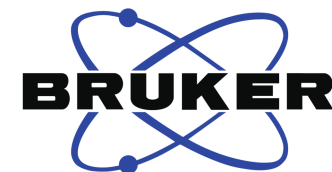

Current Data Parameters  
 NAME Kainat Khurshid  
 EXPNO 498  
 PROCNO 1

F2 - Acquisition Parameters  
 Date\_ 20230831  
 Time 15.08 h  
 INSTRUM spect  
 PROBHD z116098\_0621 (  
 PULPROG zg30  
 TD 65536  
 SOLVENT CDCl3  
 NS 16  
 DS 2  
 SWH 8012.820 Hz  
 FIDRES 0.244532 Hz  
 AQ 4.0894465 sec  
 RG 88.48  
 DW 62.400 usec  
 DE 6.50 usec  
 TE 298.0 K  
 D1 1.00000000 sec  
 TD0 1  
 SFO1 400.1324708 MHz  
 NUC1 1H  
 P1 10.00 usec  
 PLW1 16.68099976 W

F2 - Processing parameters  
 SI 65536  
 SF 400.1300000 MHz  
 WDW EM  
 SSB 0  
 LB 0.30 Hz  
 GB 0  
 PC 1.00

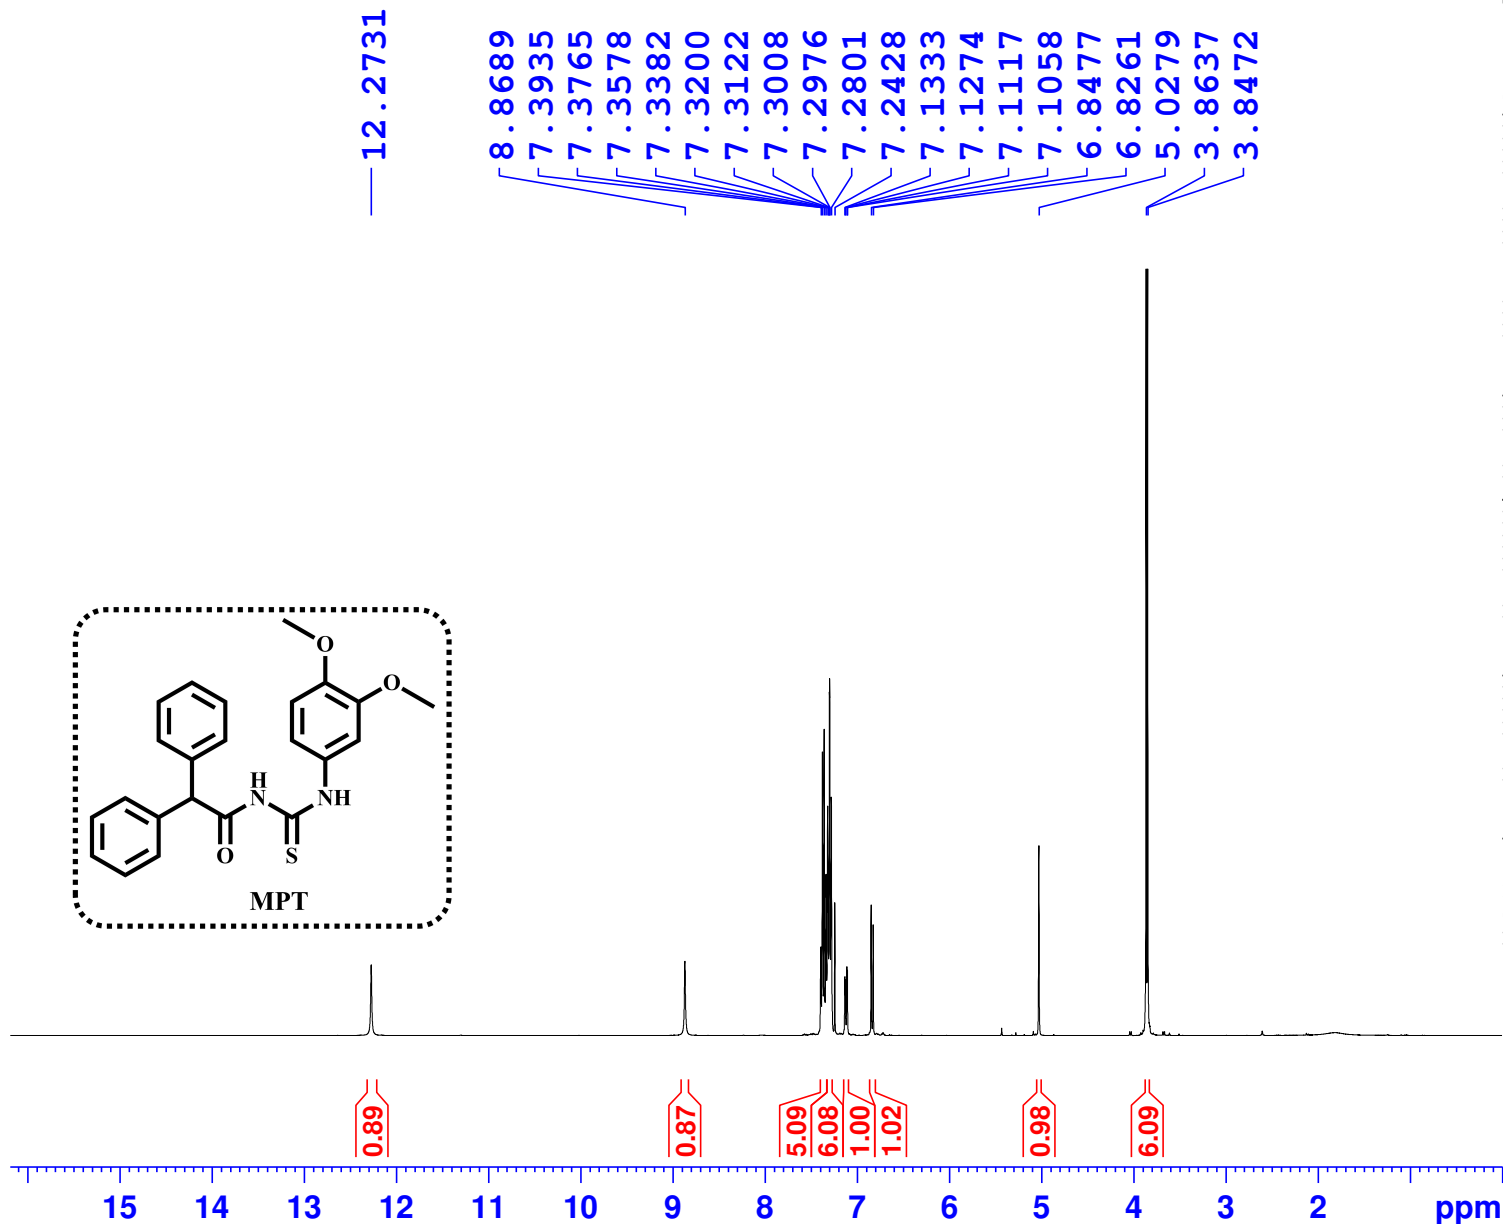

# MPT (1H-NMR, CDCl3, 400 MHz)

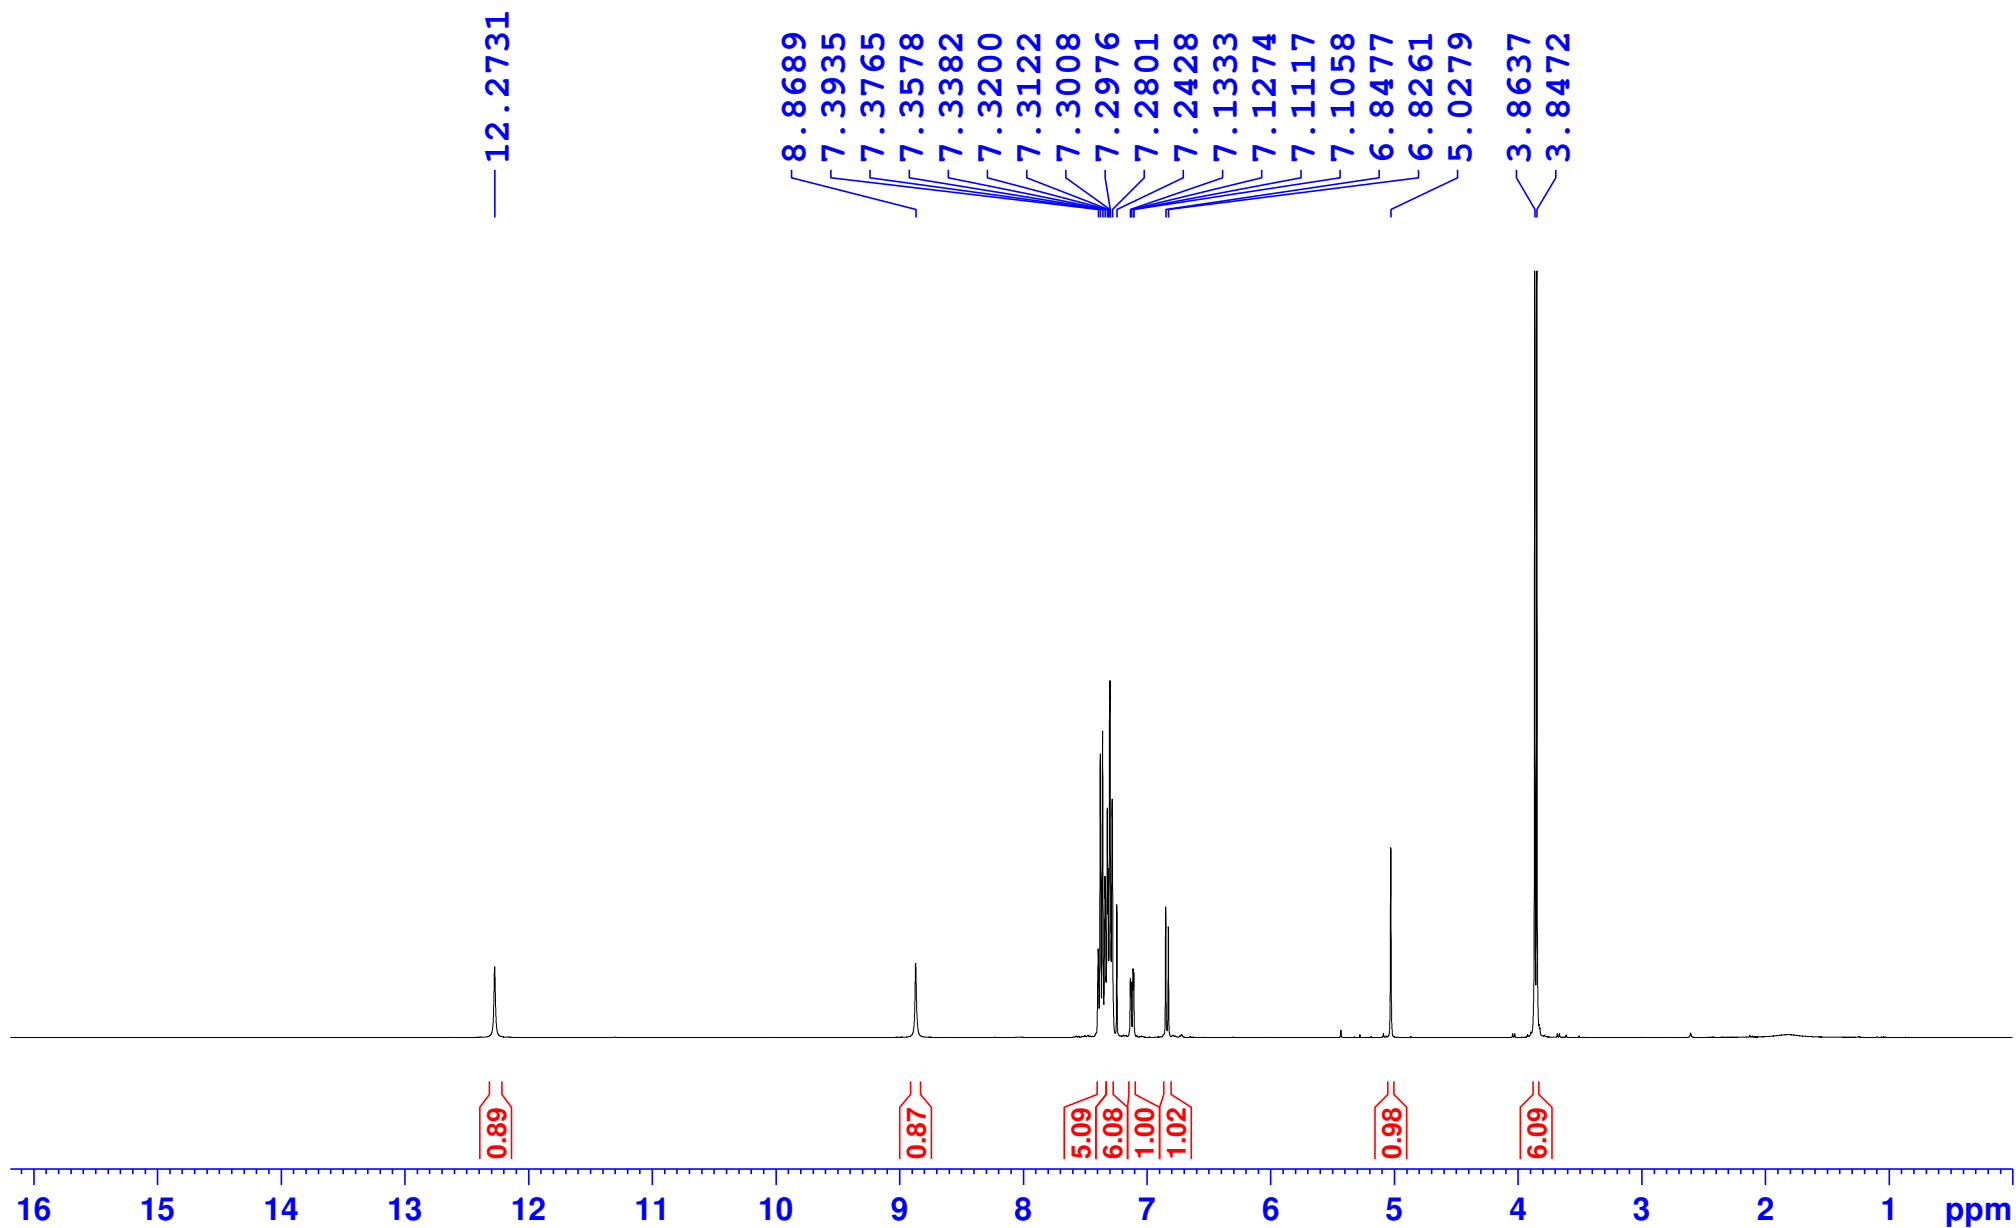



# MPT (1H-NMR, CDCl3, 400 MHz)

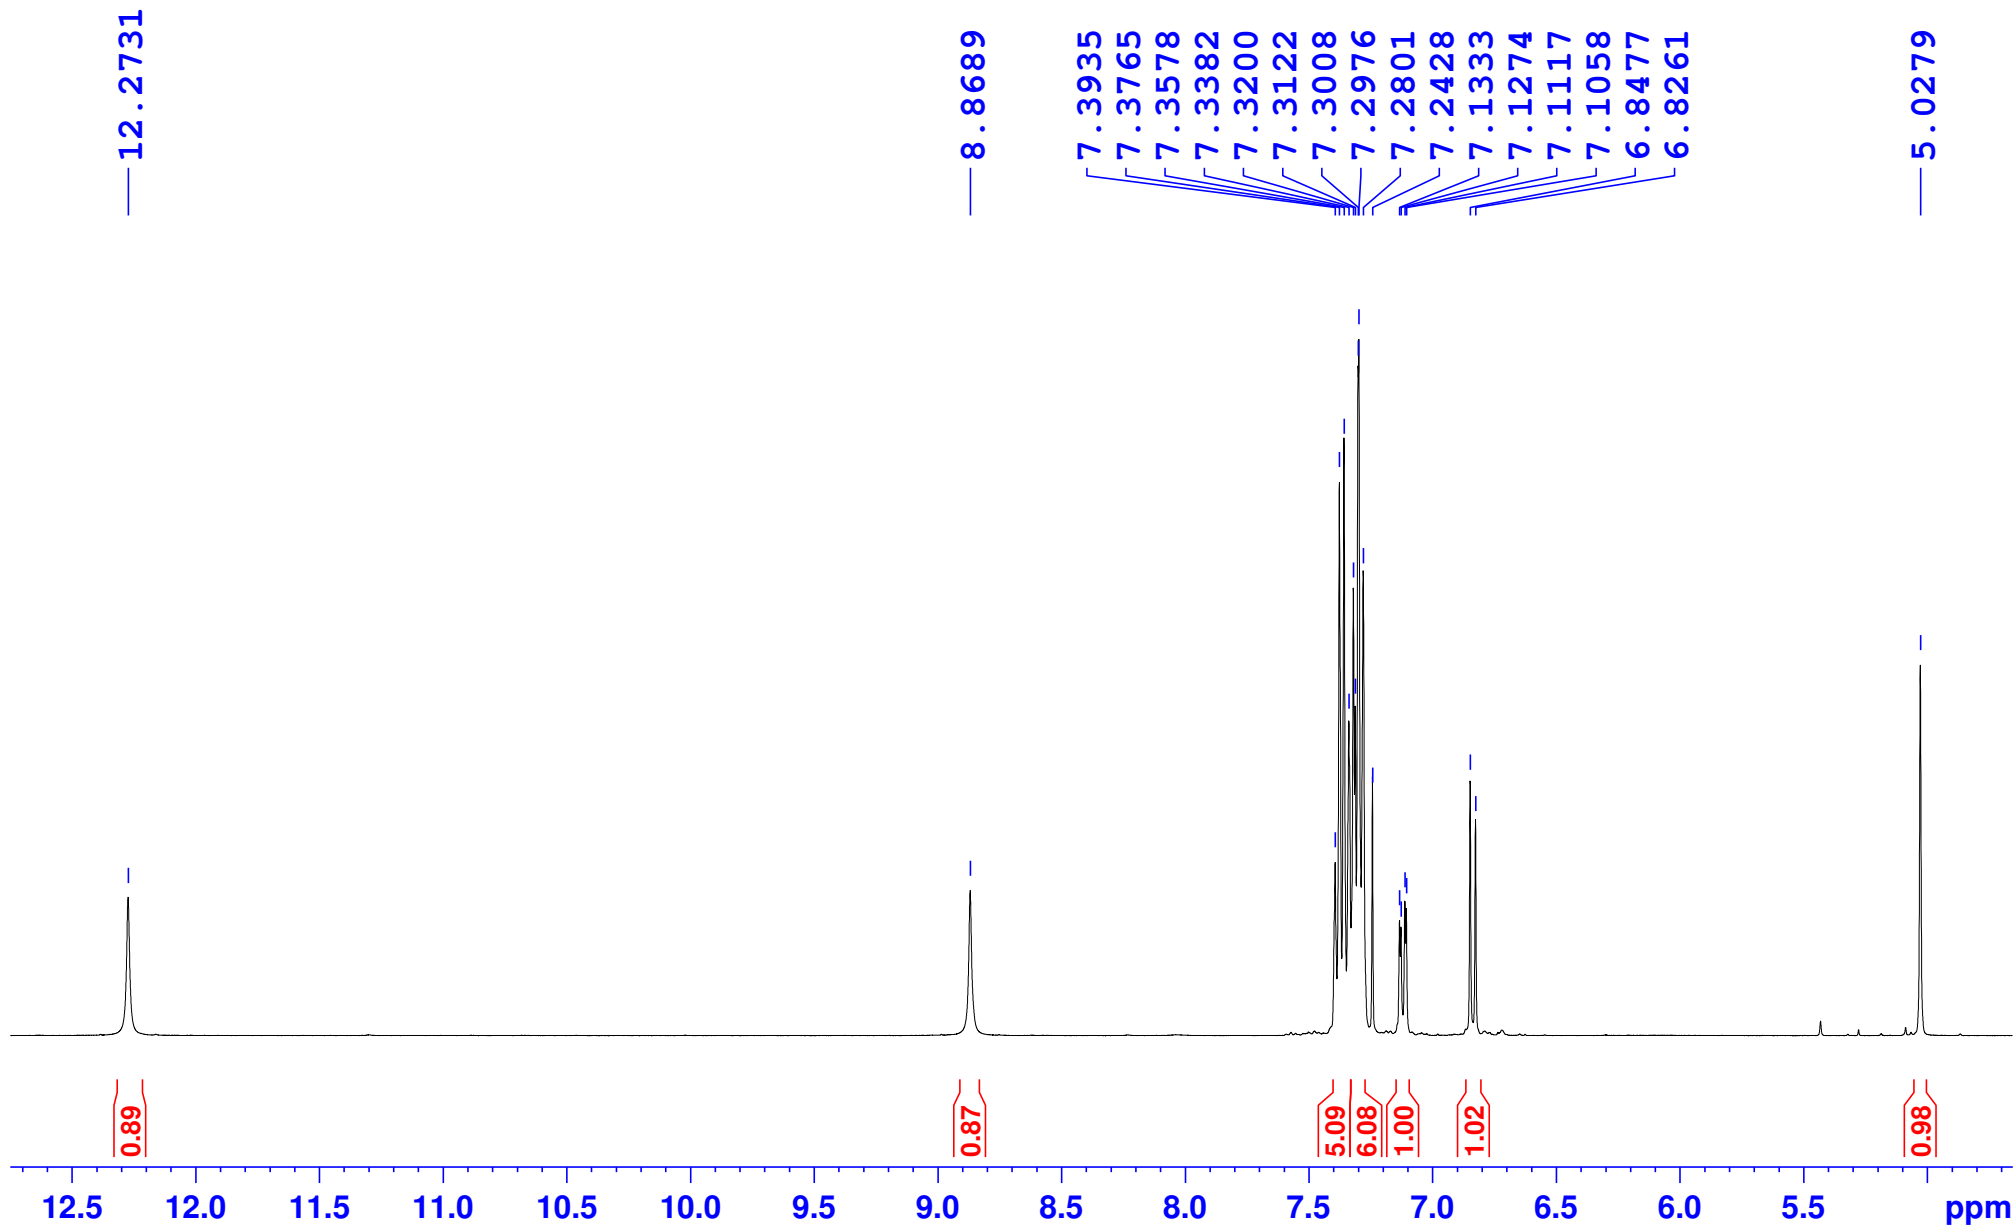

MPT (1H-NMR, CDCl3, 400 MHz)

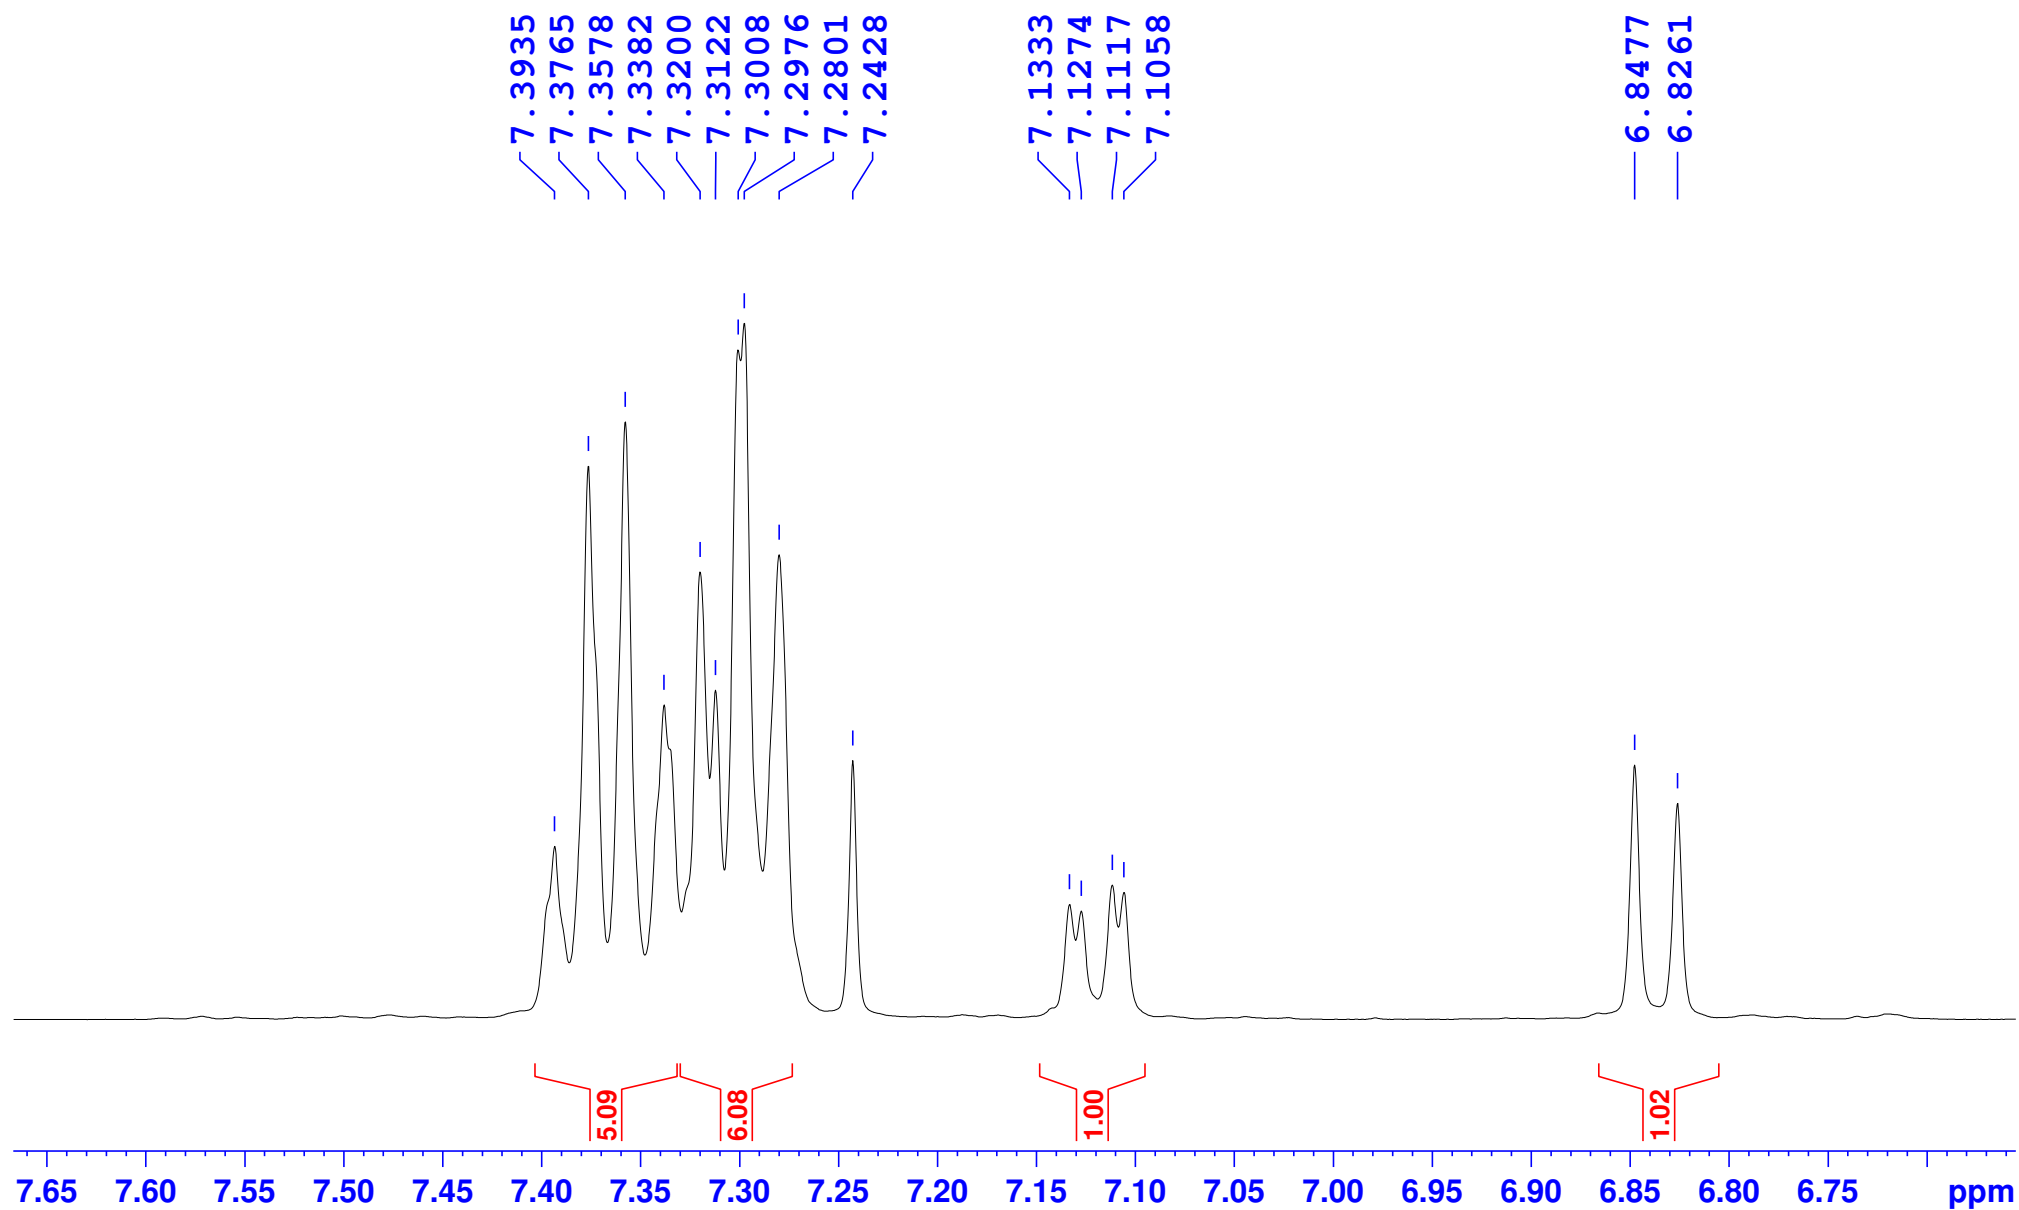

MPT (1H-NMR, CDCl3, 400 MHz)

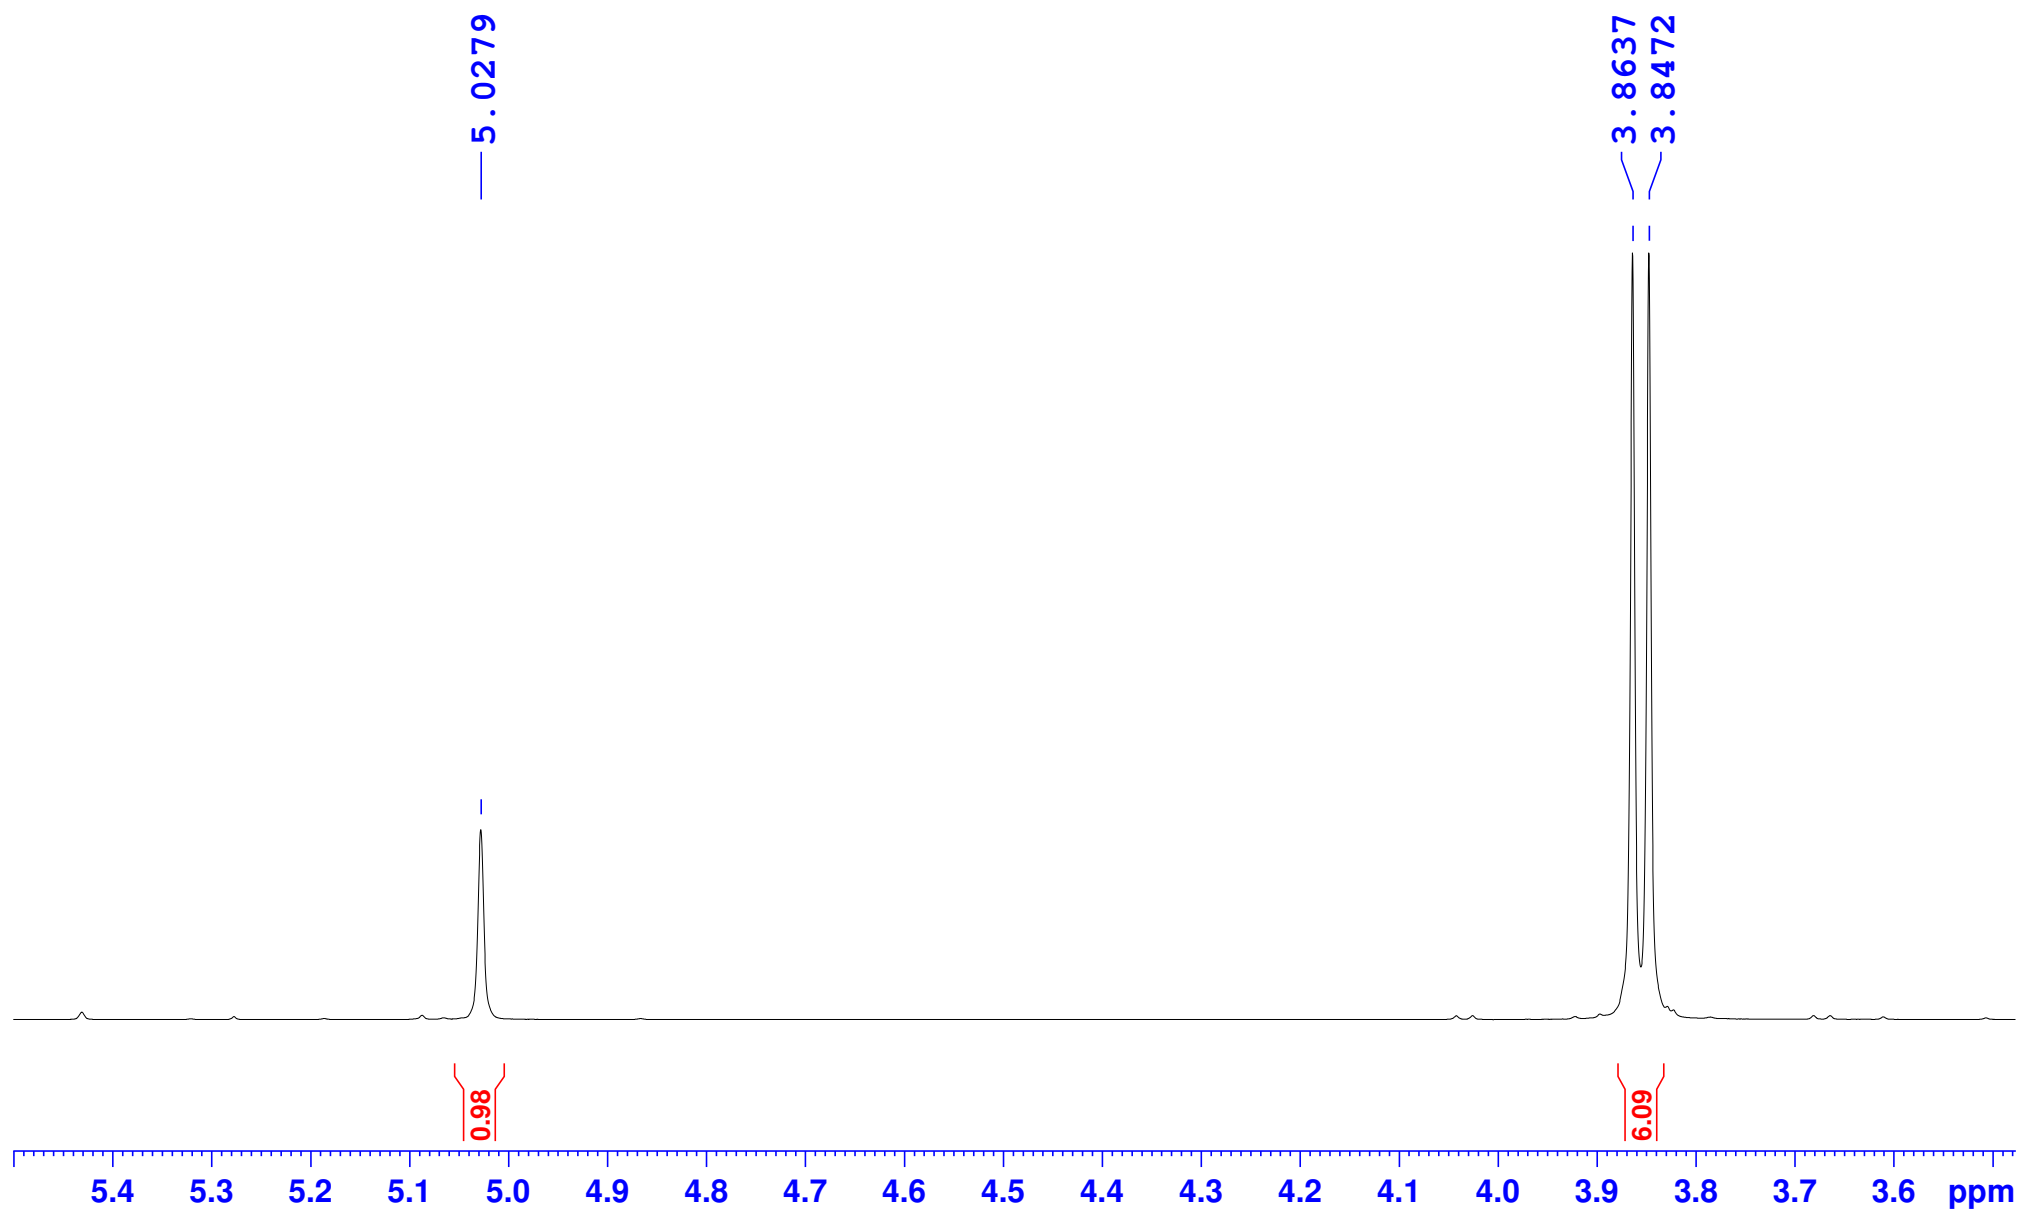

**MPT (1H-NMR, CDCl3, 400 MHz)**

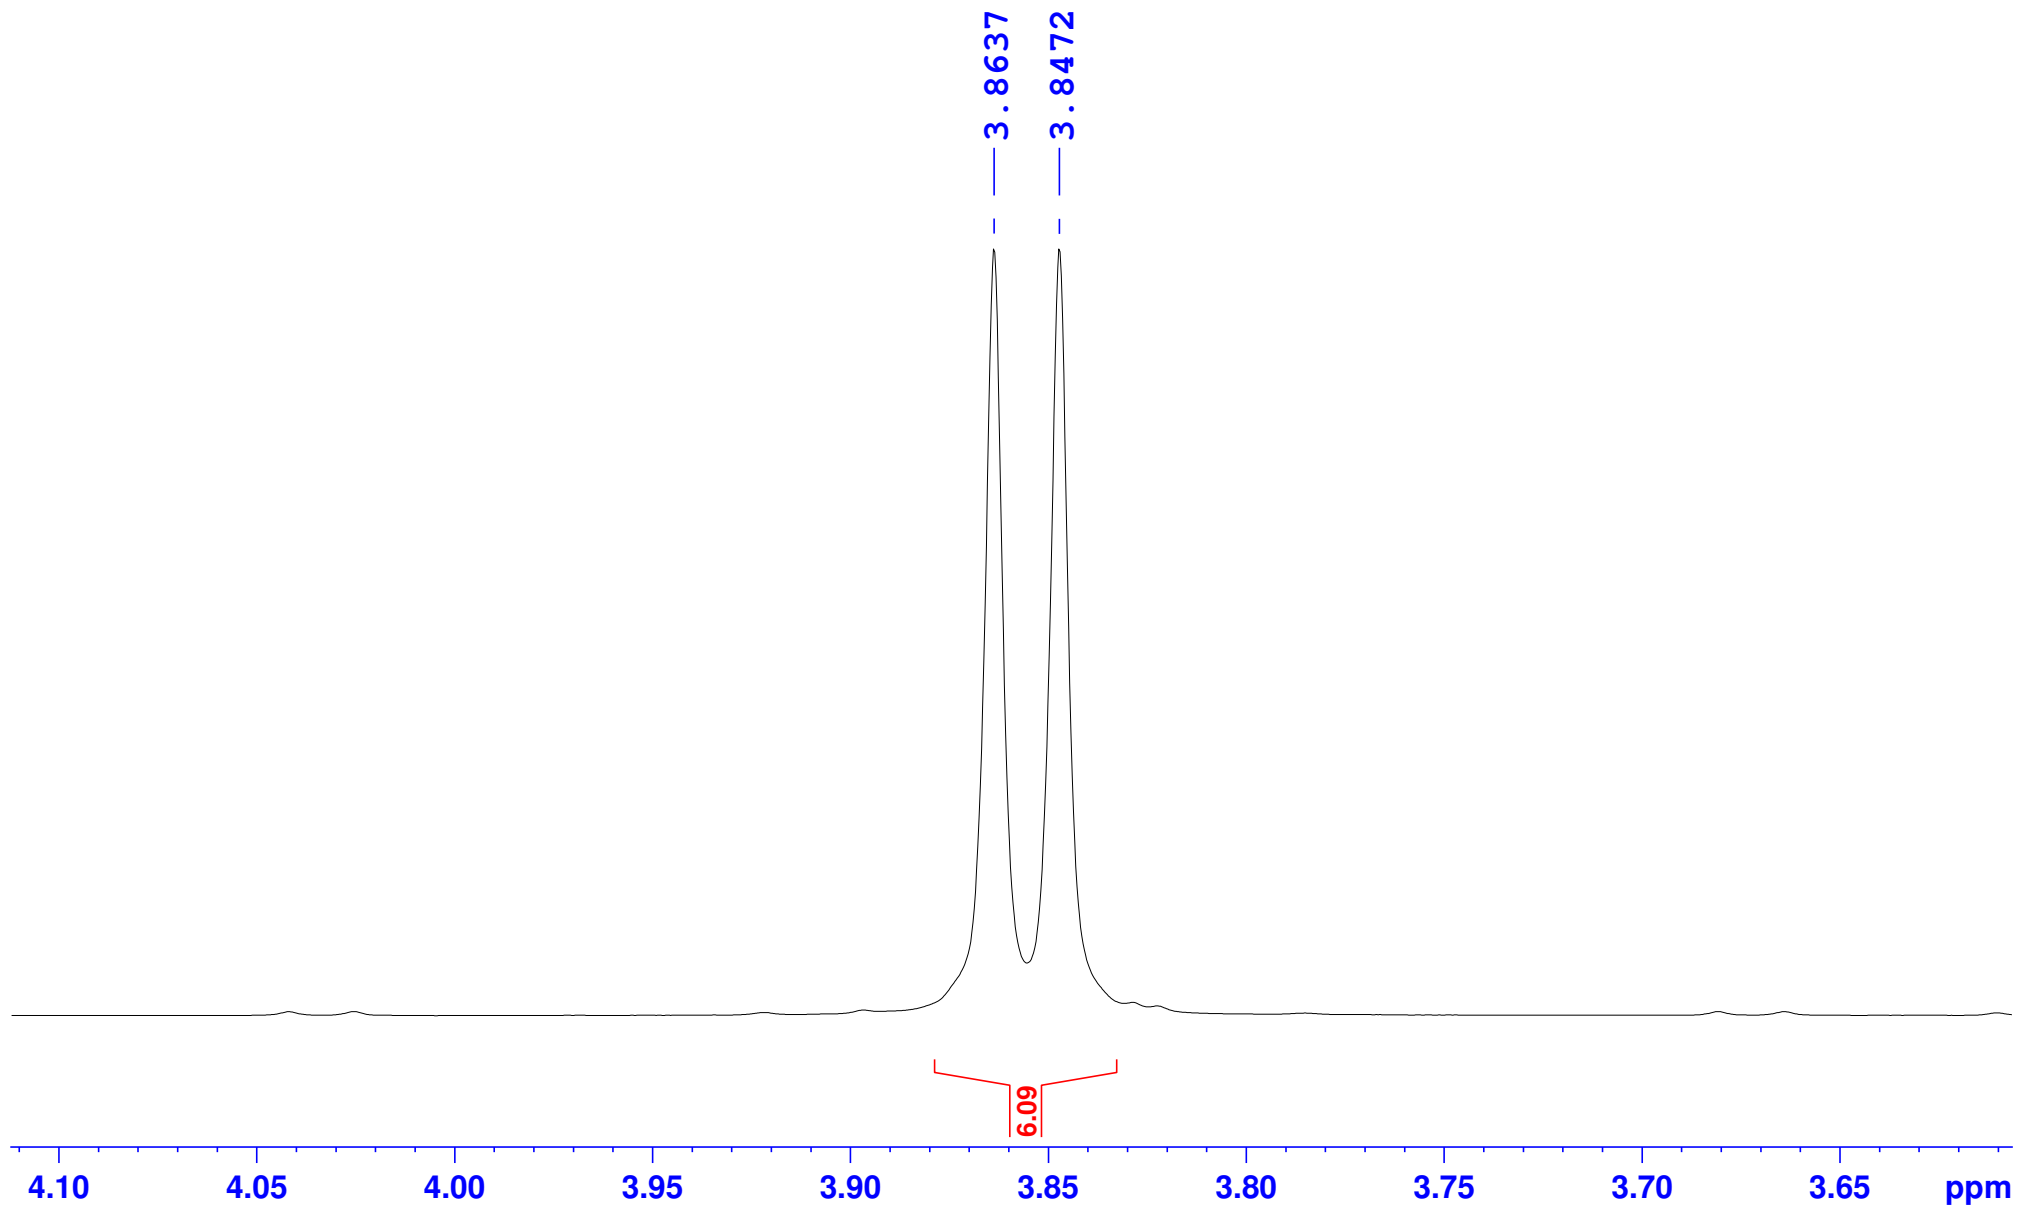

MPT (1H-NMR, CDCl3, 400 MHz)

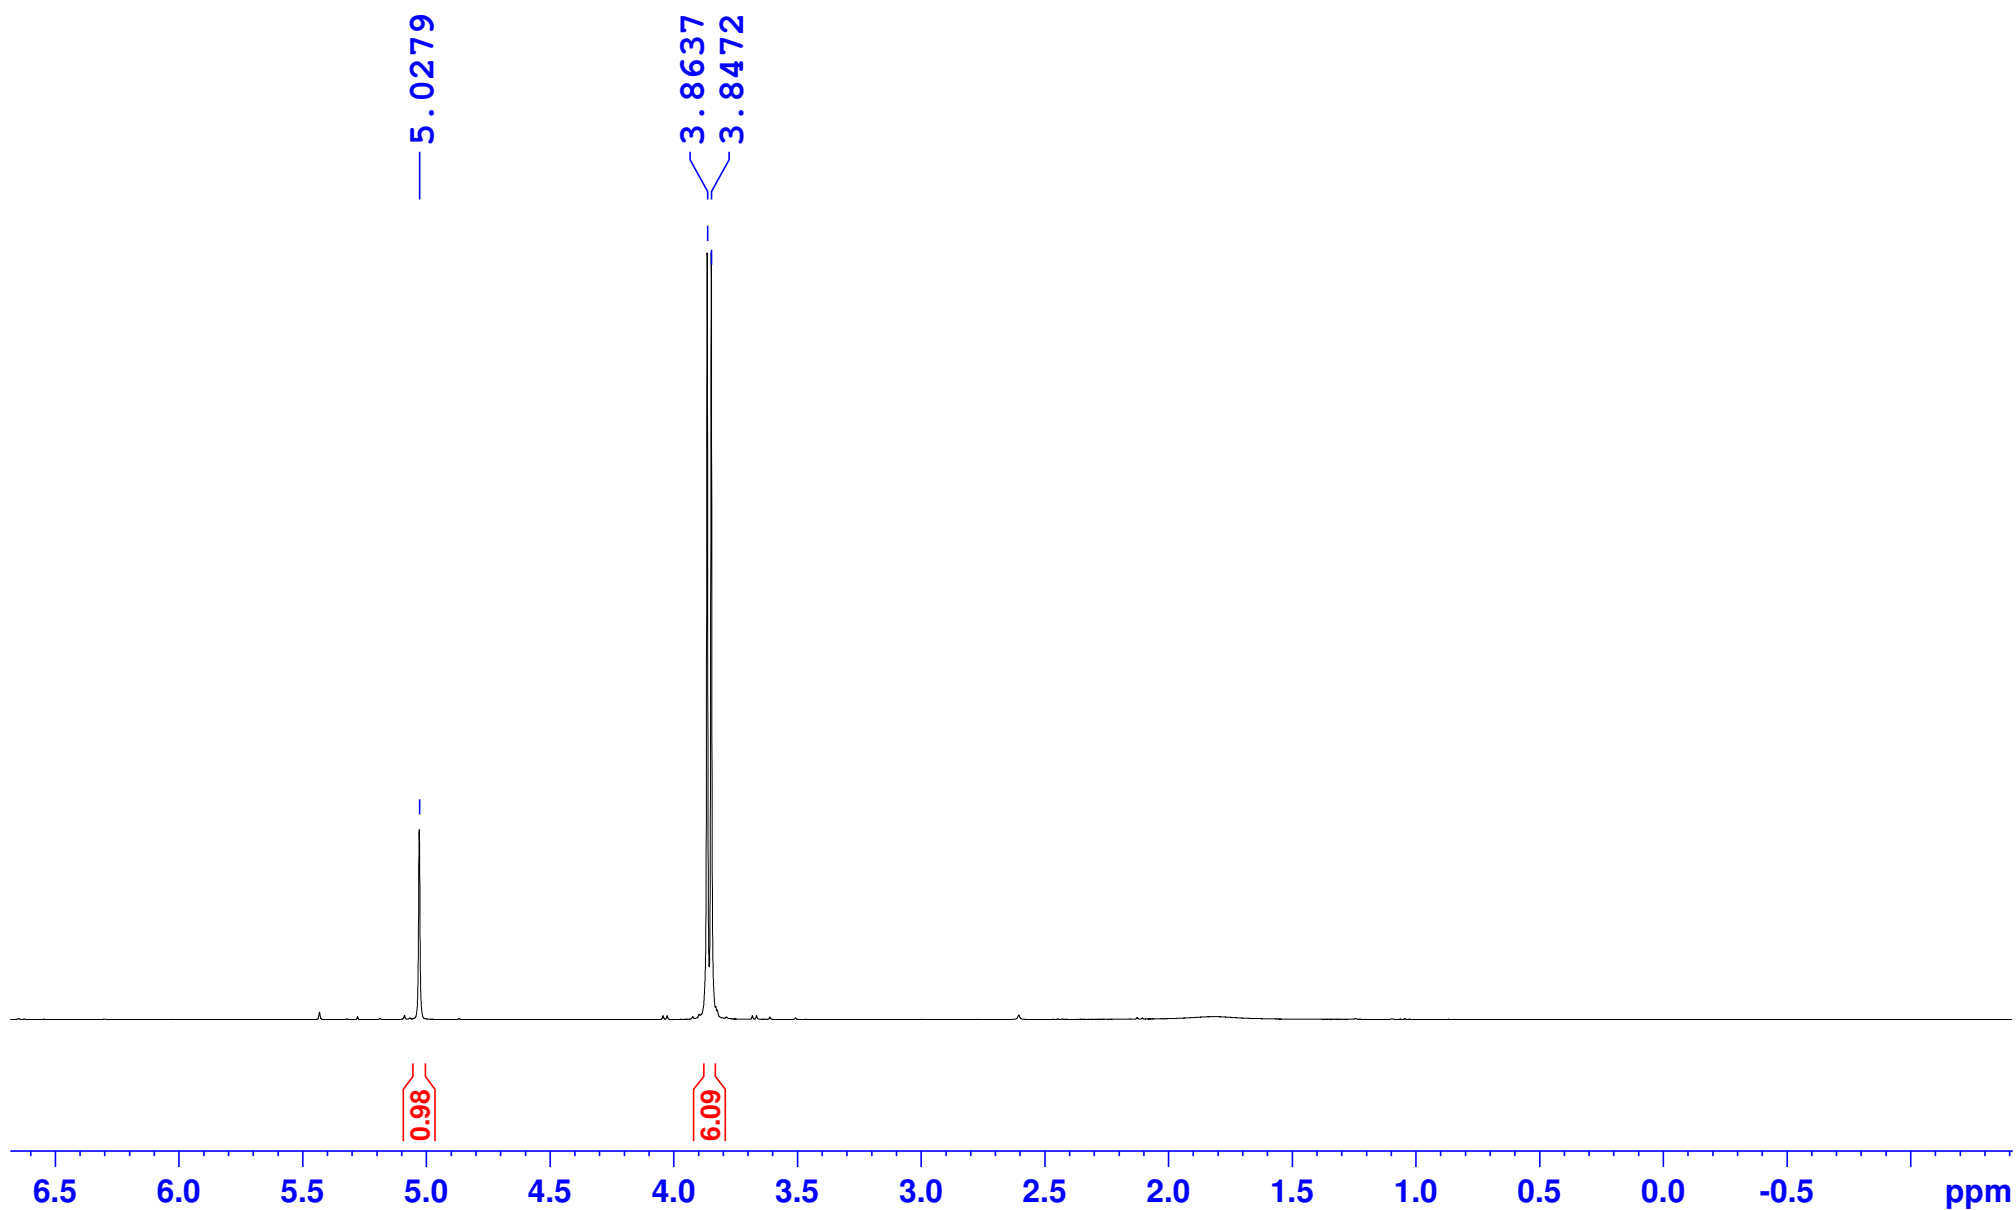

# MPT (13C-NMR, CDCl3, 400 MHz)

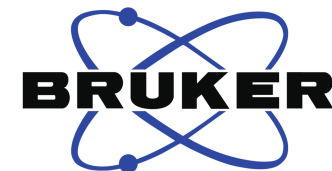

Current Data Parameters  
 NAME Kainat Khurshid  
 EXPNO 499  
 PROCNO 1

F2 - Acquisition Parameters  
 Date\_ 20230901  
 Time 13.00 h  
 INSTRUM spect  
 PROBHD z116098\_0621 (  
 PULPROG zgpg30  
 TD 65536  
 SOLVENT CDCl3  
 NS 800  
 DS 2  
 SWH 24038.461 Hz  
 FIDRES 0.733596 Hz  
 AQ 1.3631488 sec  
 RG 199.48  
 DW 20.800 usec  
 DE 6.50 usec  
 TE 298.0 K  
 D1 2.00000000 sec  
 D11 0.03000000 sec  
 TD0 1  
 SFO1 100.6243390 MHz  
 NUC1 13C  
 P1 10.00 usec  
 PLW1 72.56700134 W  
 SFO2 400.1316005 MHz  
 NUC2 1H  
 CPDPRG[2] waltz16  
 PCPD2 90.00 usec  
 PLW2 16.68099976 W  
 PLW12 0.20593999 W  
 PLW13 0.10342000 W

F2 - Processing parameters  
 SI 32768  
 SF 100.6127685 MHz  
 WDW EM  
 SSB 0  
 LB 1.00 Hz  
 GB 0  
 PC 1.40

177.60  
 173.05  
 148.79  
 147.66  
 136.91  
 130.55  
 129.13  
 128.77  
 128.12  
 116.12  
 110.81  
 107.95  
 77.32  
 77.00  
 76.69  
 59.50  
 55.99

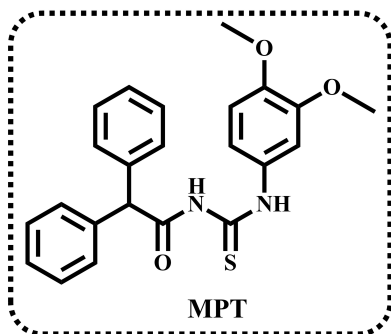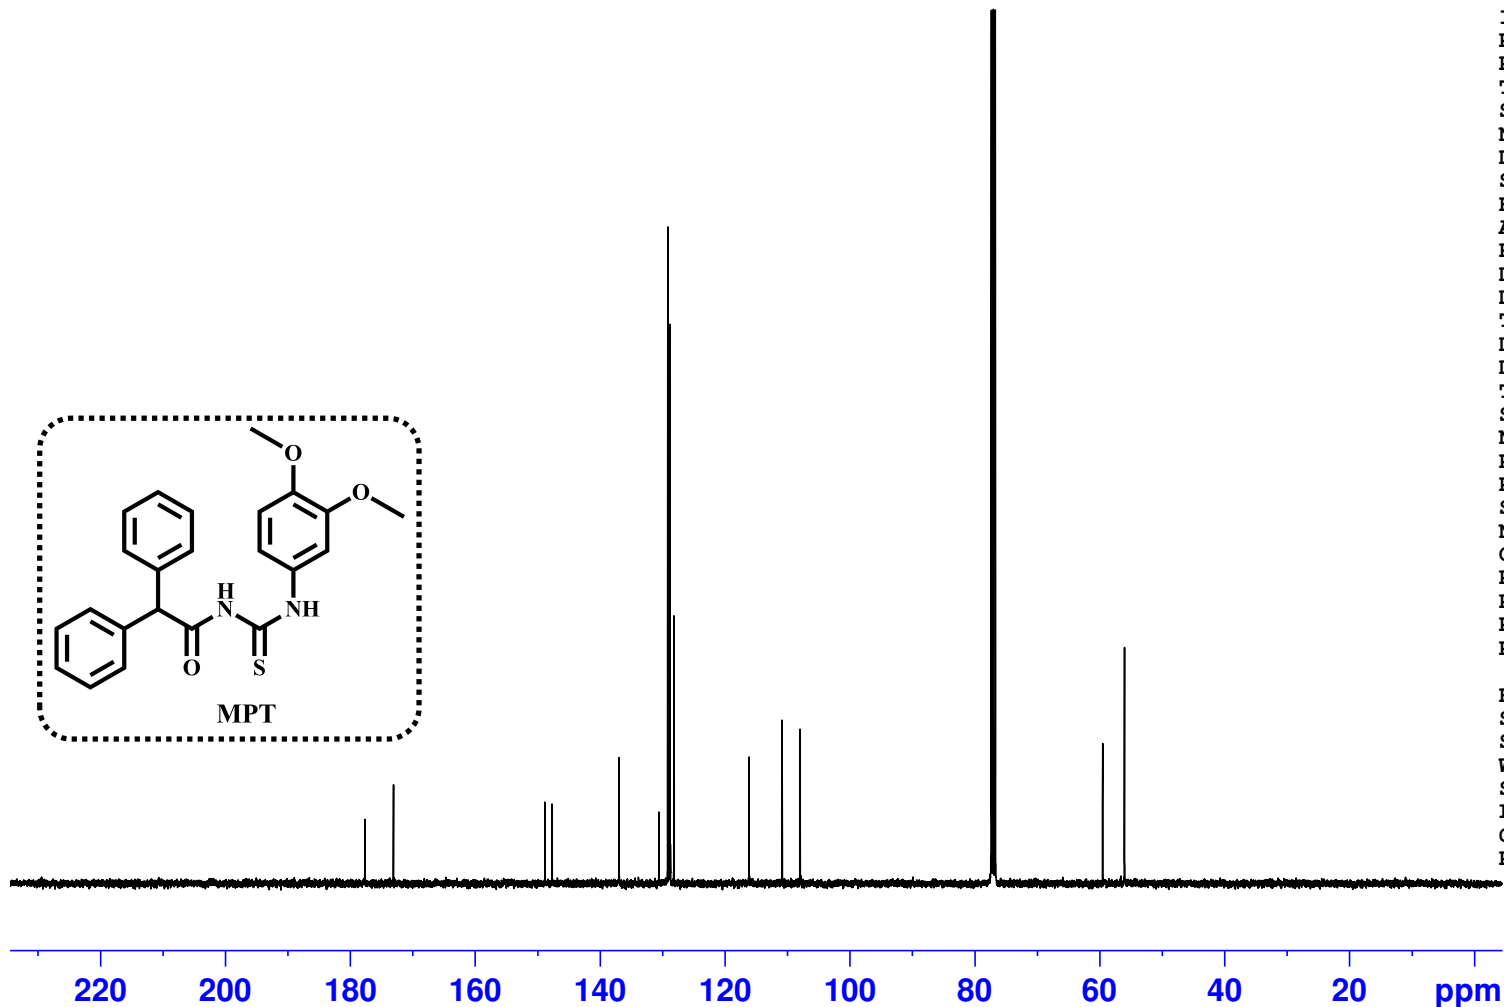

# MPT (13C-NMR, CDCl3, 400 MHz)

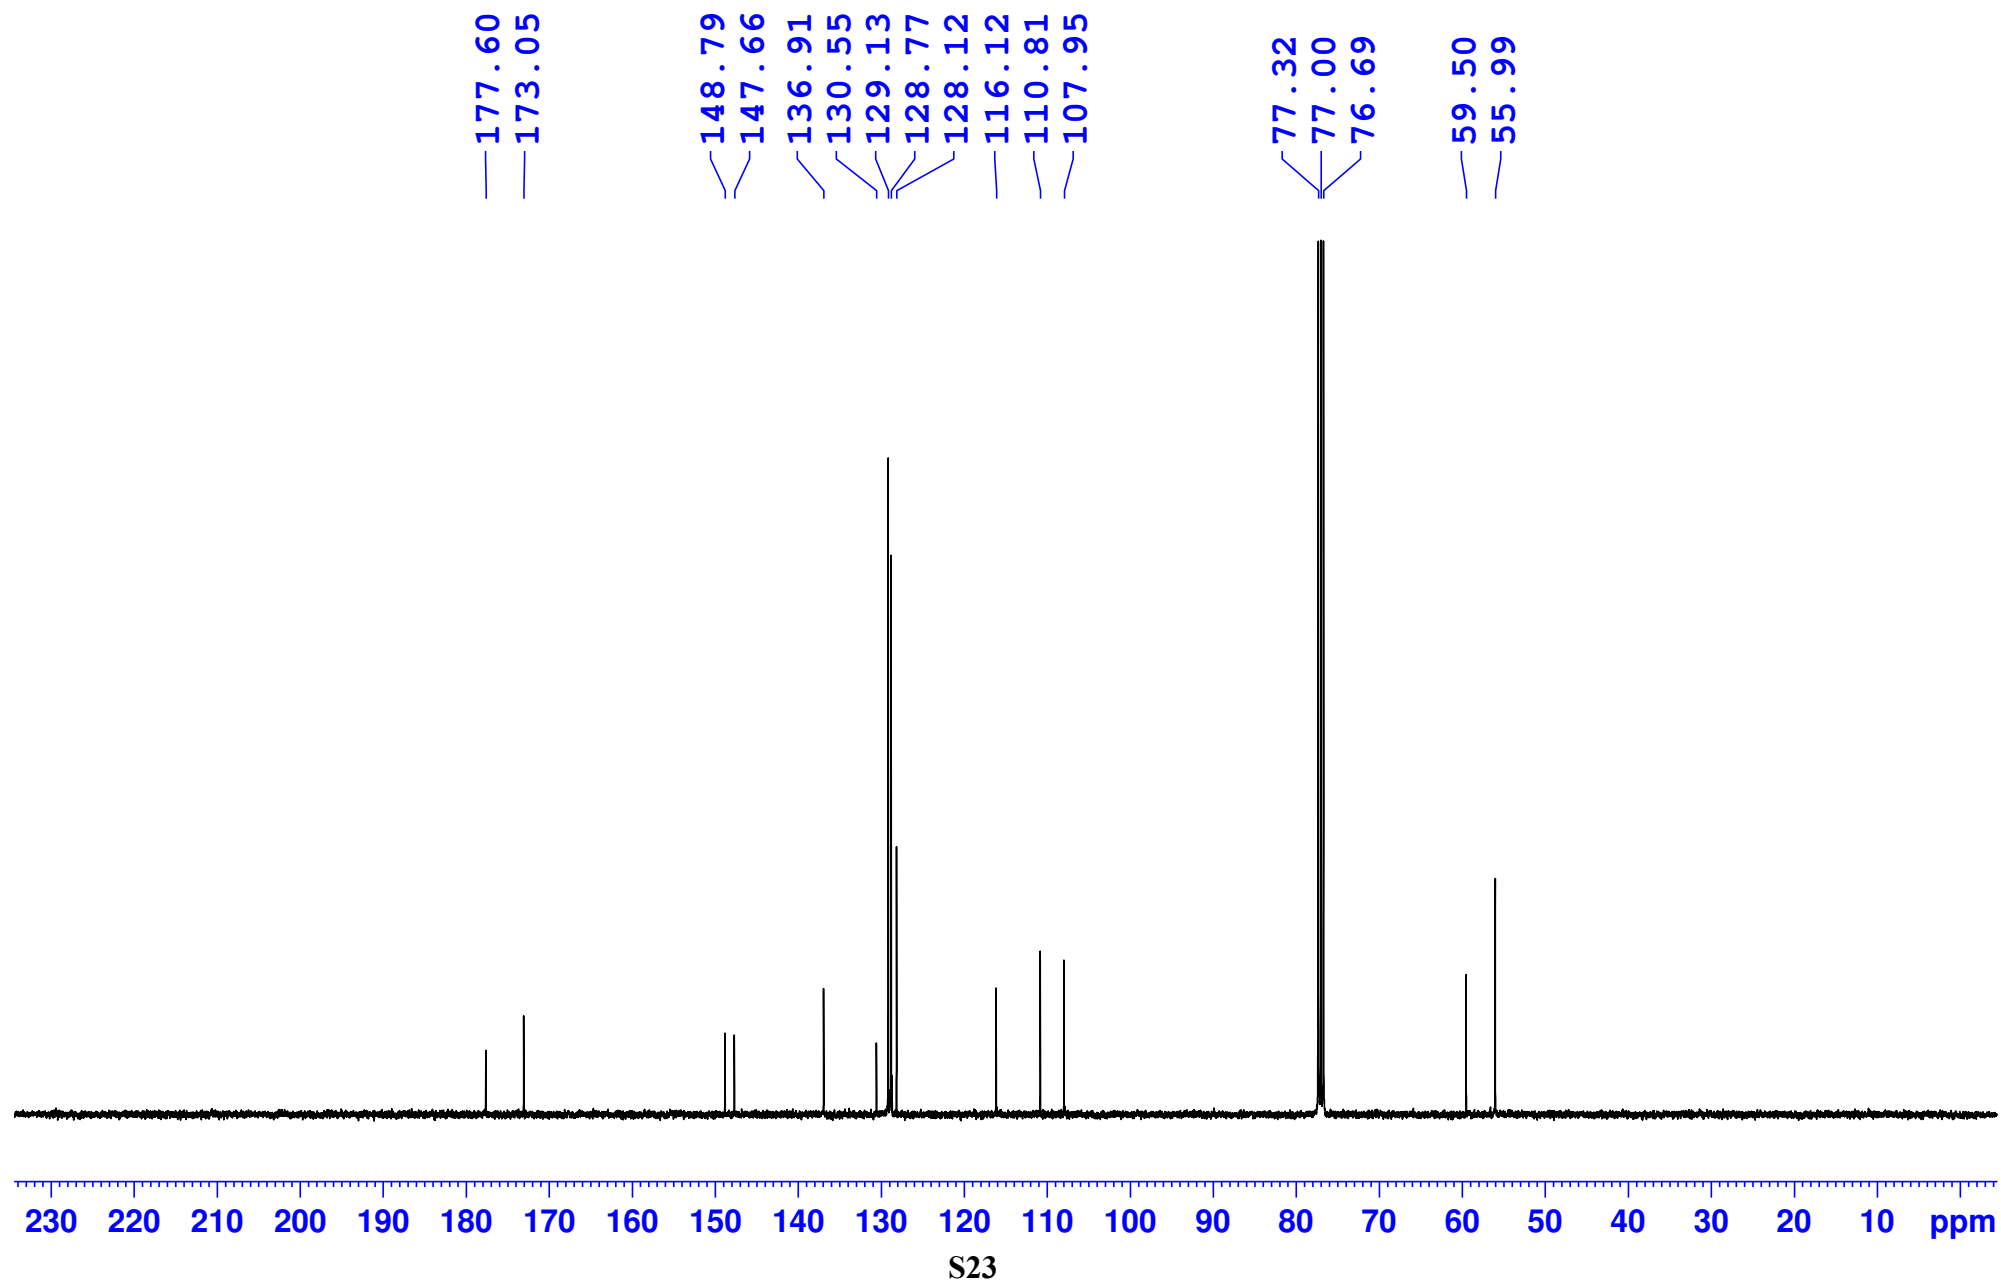

# MPT (13C-NMR, CDCl3, 400 MHz)

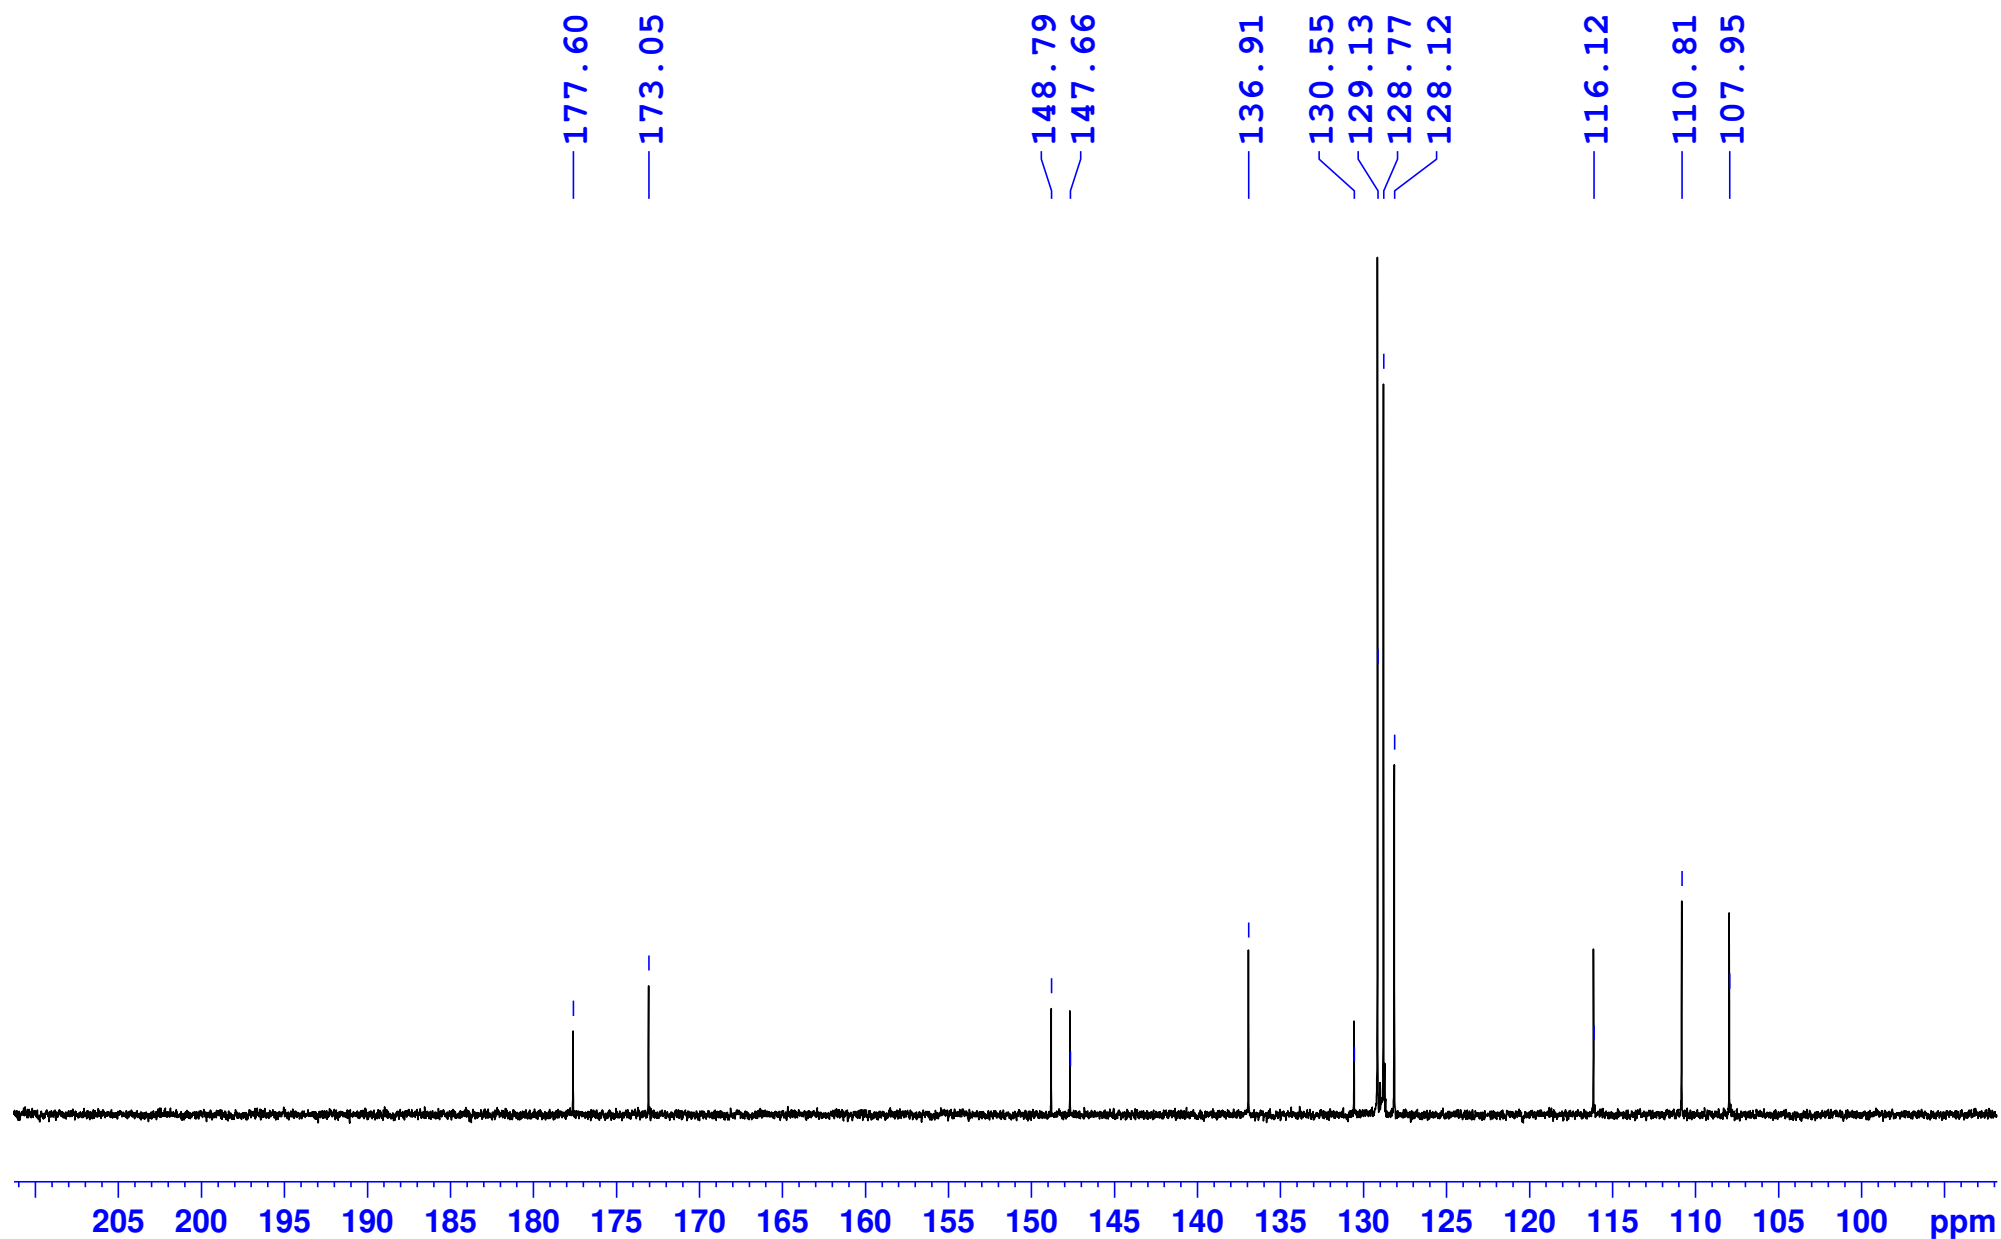



# MPT (<sup>13</sup>C-NMR, CDCl<sub>3</sub>, 400 MHz)

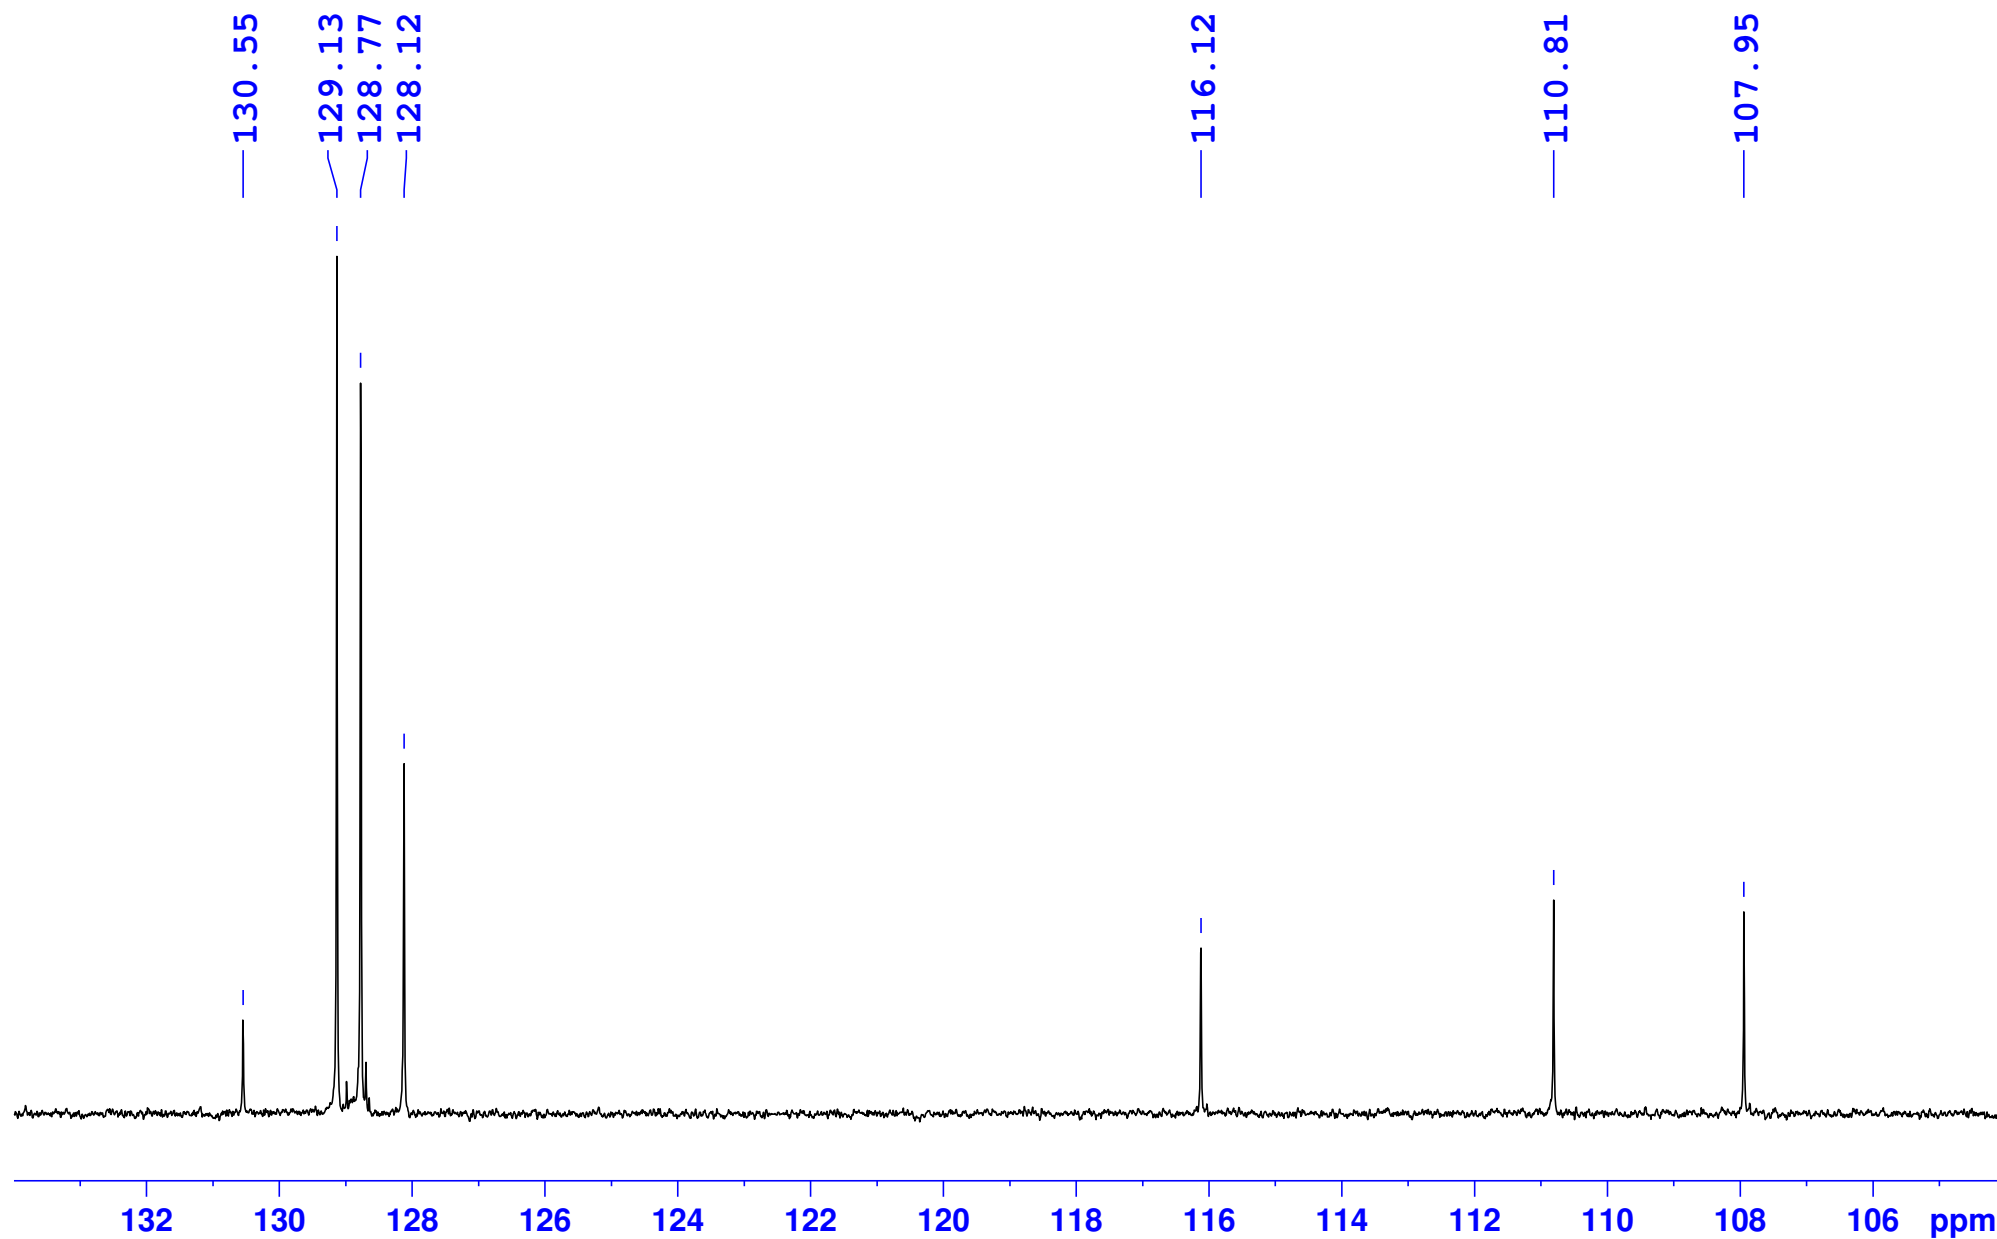

# MPT (13C-NMR, CDCl3, 400 MHz)

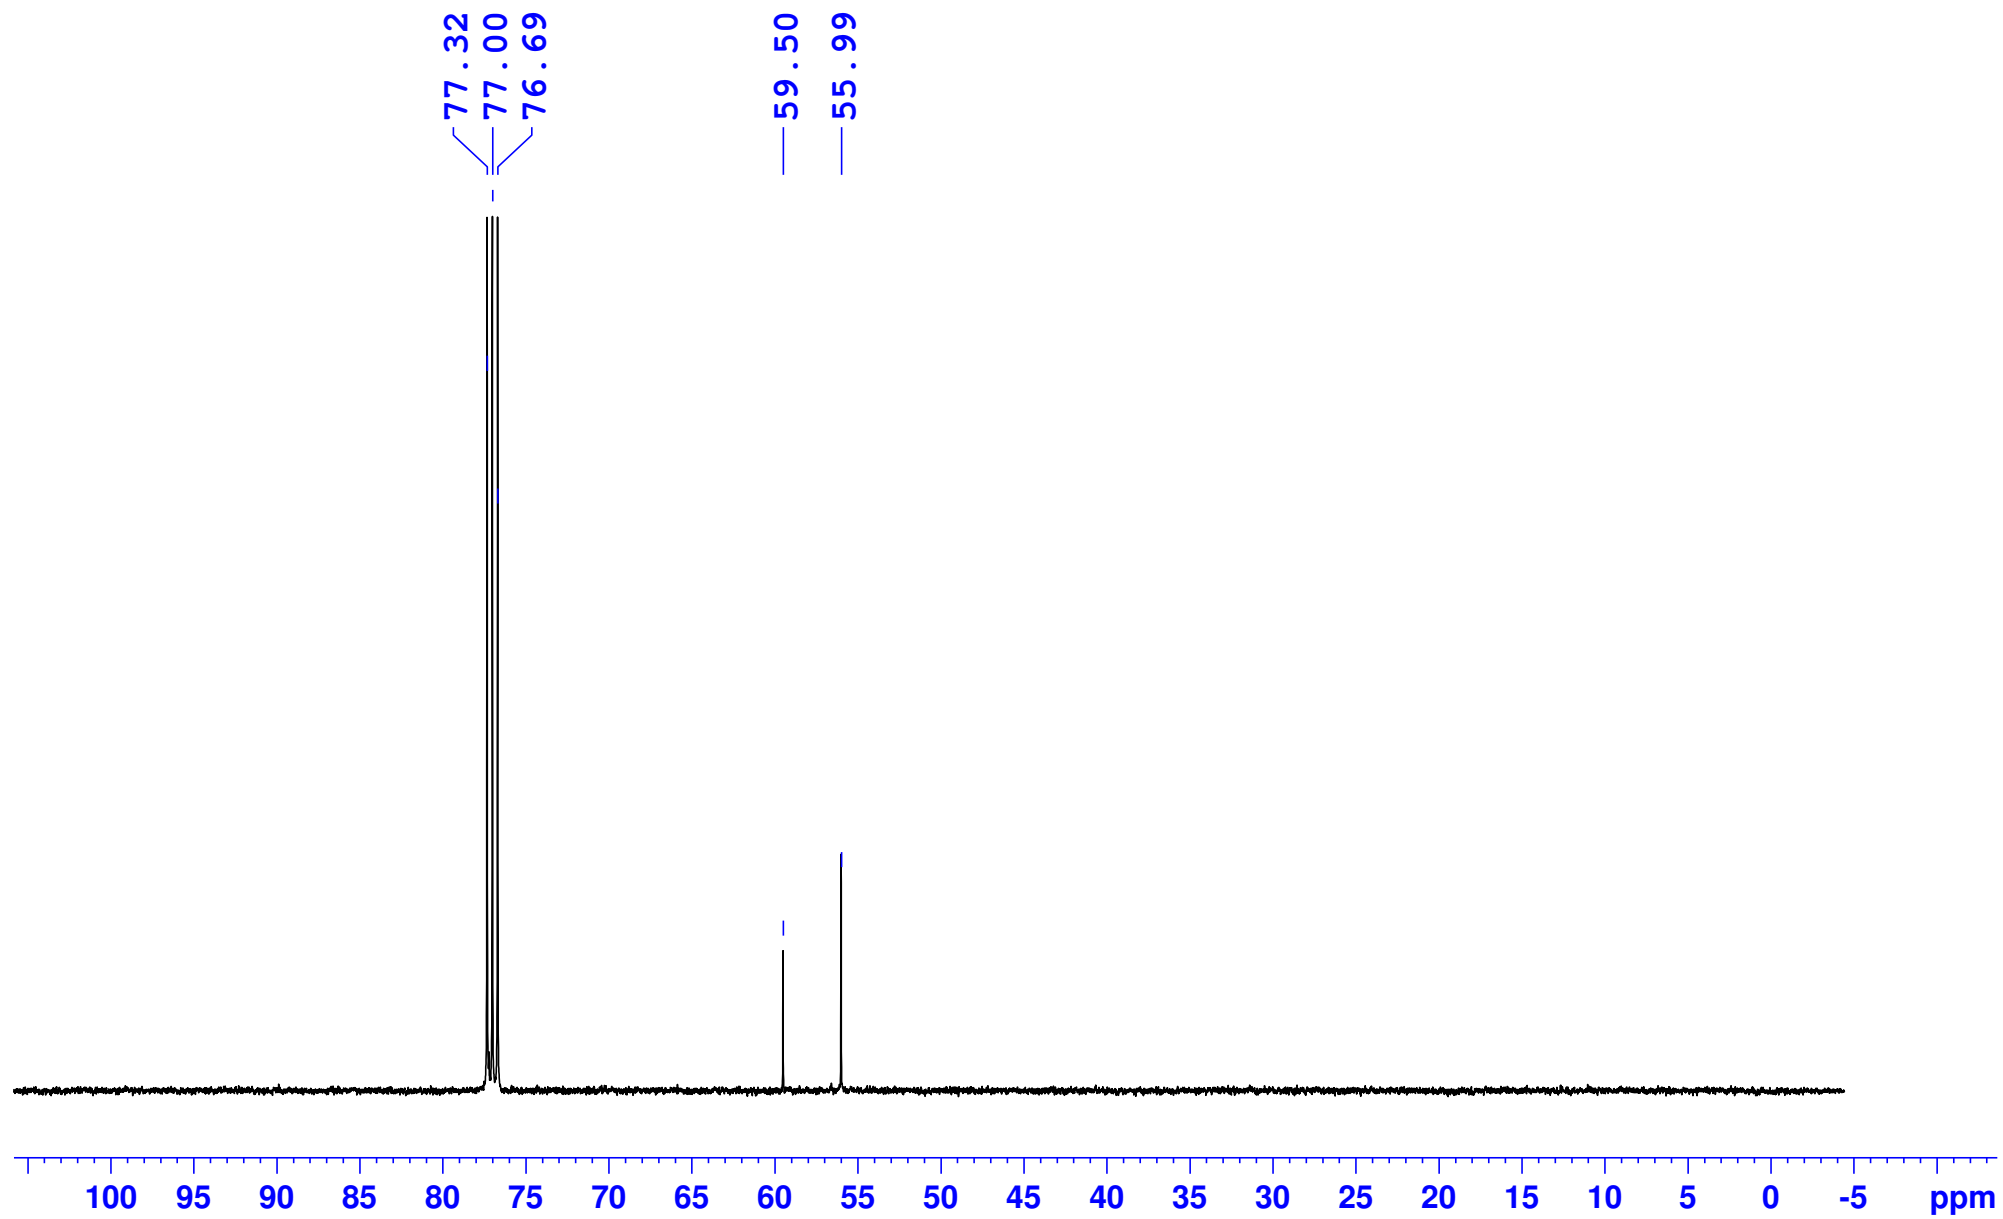

# MPT (DEPT, CDCI3, 400MHz)

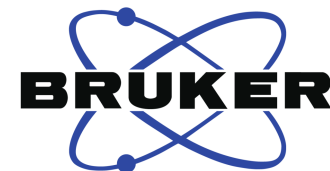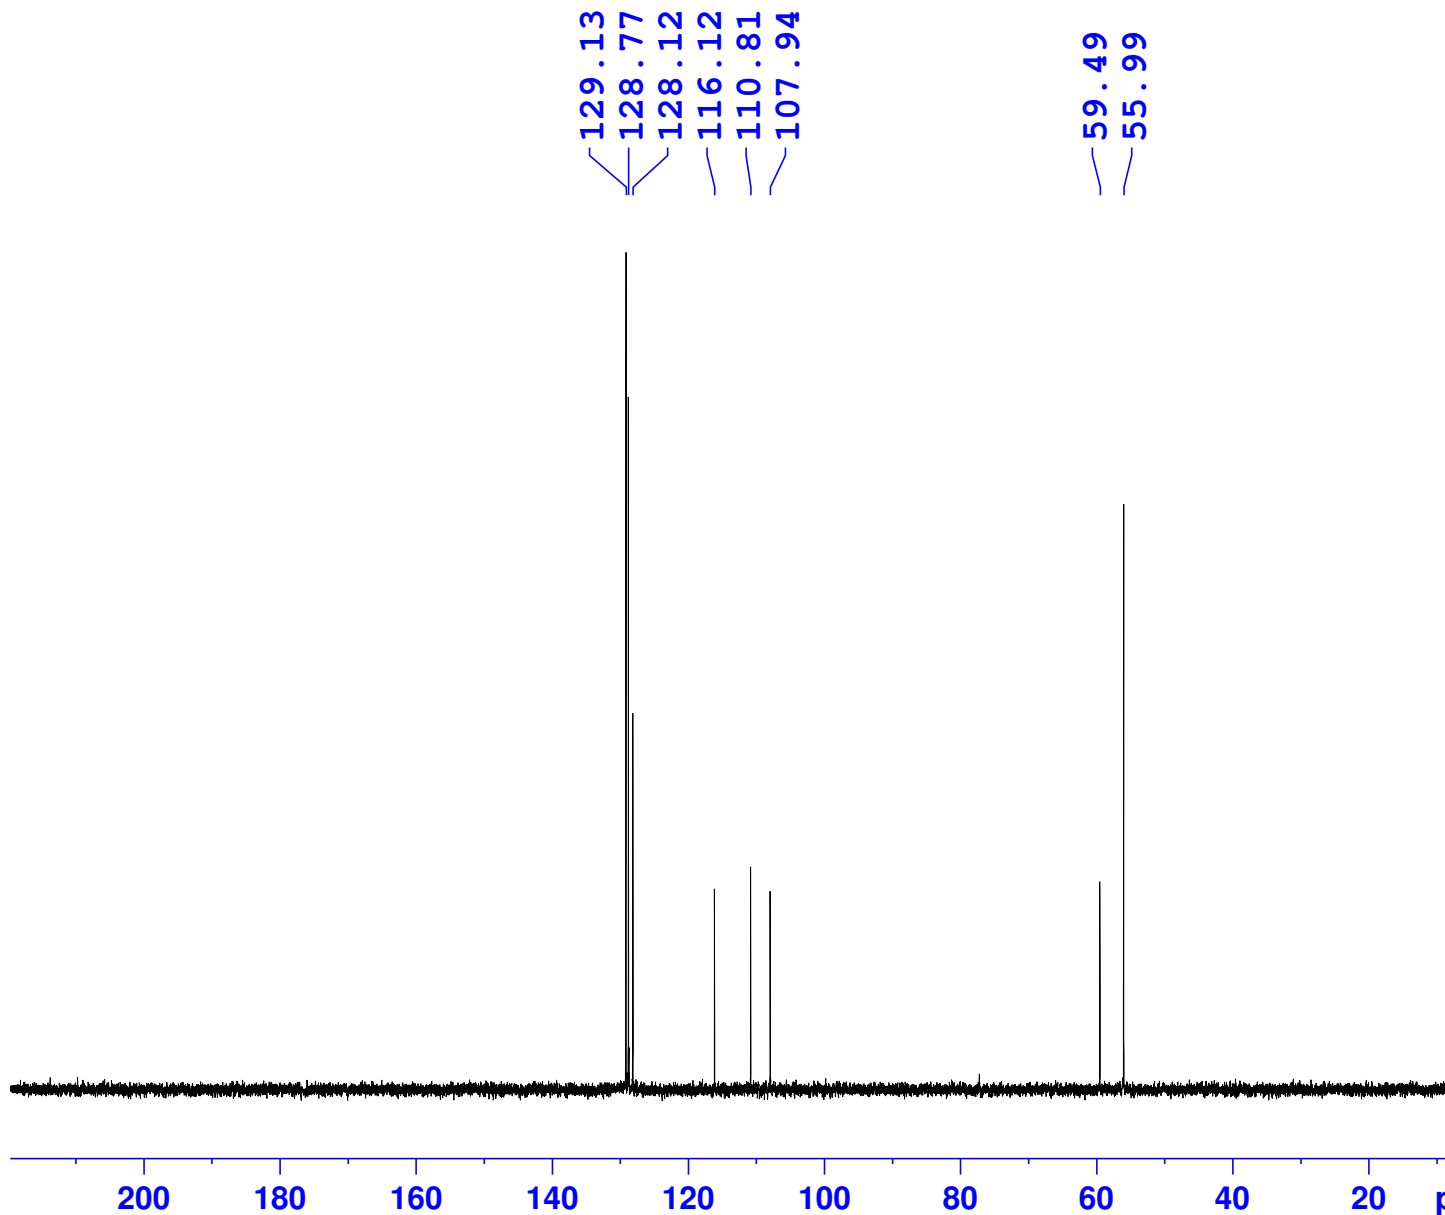

Current Data Parameters  
 NAME Kainat Khurshid  
 EXPNO 500  
 PROCNO 1

F2 - Acquisition Parameters  
 Date\_ 20230901  
 Time 13.16 h  
 INSTRUM spect  
 PROBHD Z116098\_0621 (  
 PULPROG deptsp135  
 TD 65536  
 SOLVENT CDCI3  
 NS 256  
 DS 4  
 SWH 22058.824 Hz  
 FIDRES 0.673182 Hz  
 AQ 1.4854827 sec  
 RG 199.48  
 DW 22.667 usec  
 DE 6.50 usec  
 TE 298.0 K  
 CNST2 145.0000000  
 D1 2.00000000 sec  
 D2 0.00344828 sec  
 D12 0.00002000 sec  
 TD0 1  
 SFO1 100.6238359 MHz  
 NUC1 13C  
 P1 10.00 usec  
 P13 2000.00 usec  
 PLW0 0 W  
 PLW1 72.56700134 W  
 SPNAM[5] Crp60comp.4  
 SPOAL5 0.500  
 SPOFFS5 0 Hz  
 SPW5 11.08699989 W  
 SFO2 400.1316005 MHz  
 NUC2 1H  
 CPDPRG[2] waltz16  
 P3 10.00 usec  
 P4 20.00 usec  
 PCPD2 90.00 usec  
 PLW2 16.68099976 W  
 PLW12 0.20593999 W

F2 - Processing parameters  
 SI 32768  
 SF 100.6127685 MHz  
 WDW EM  
 SSB 0  
 LB 1.00 Hz  
 GB 0  
 PC 1.40

# MPT (DEPT, CDCl<sub>3</sub>, 400MHz)

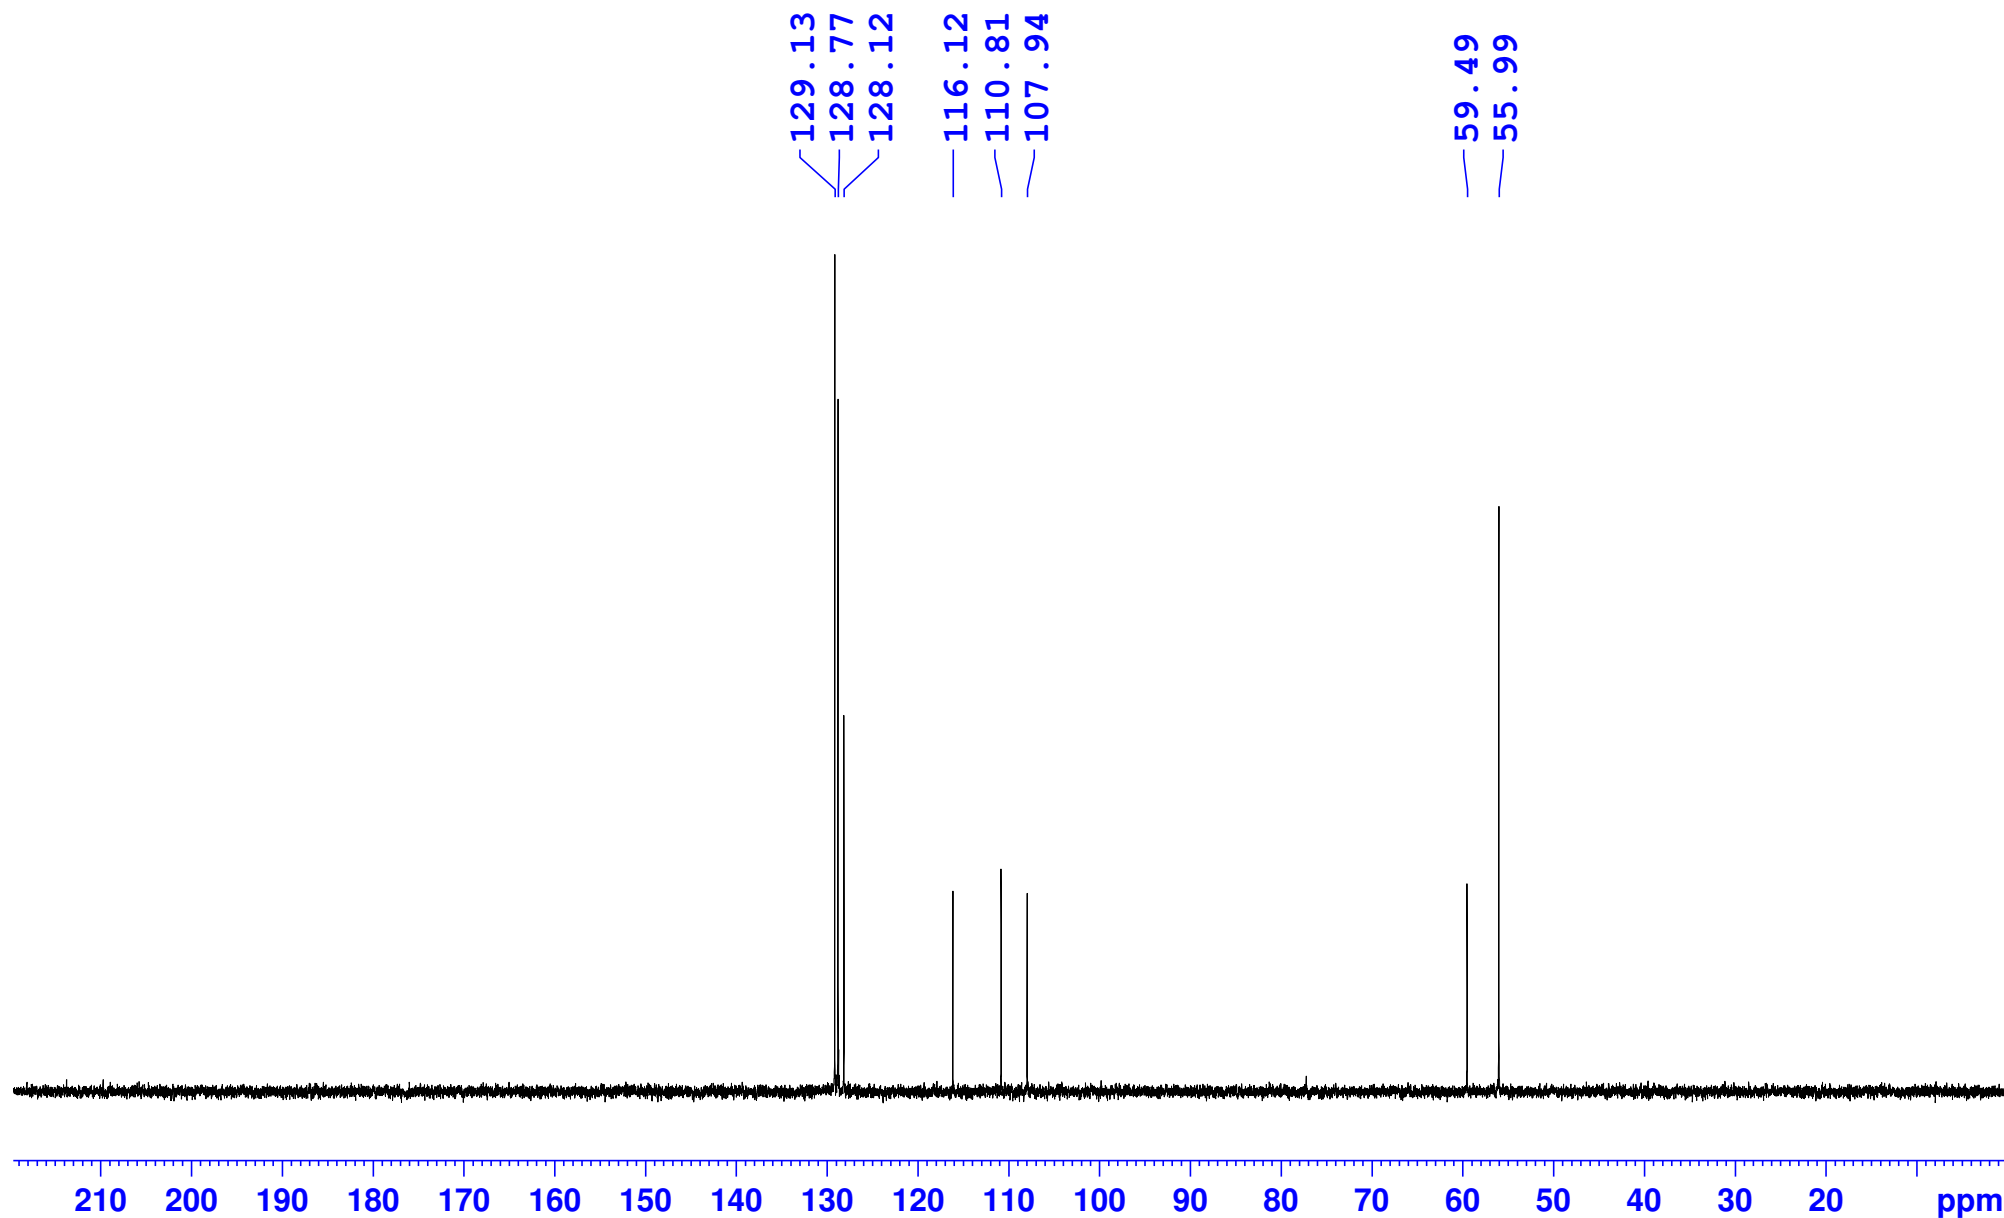

**MPT (DEPT, CDCl<sub>3</sub>, 400MHz)**

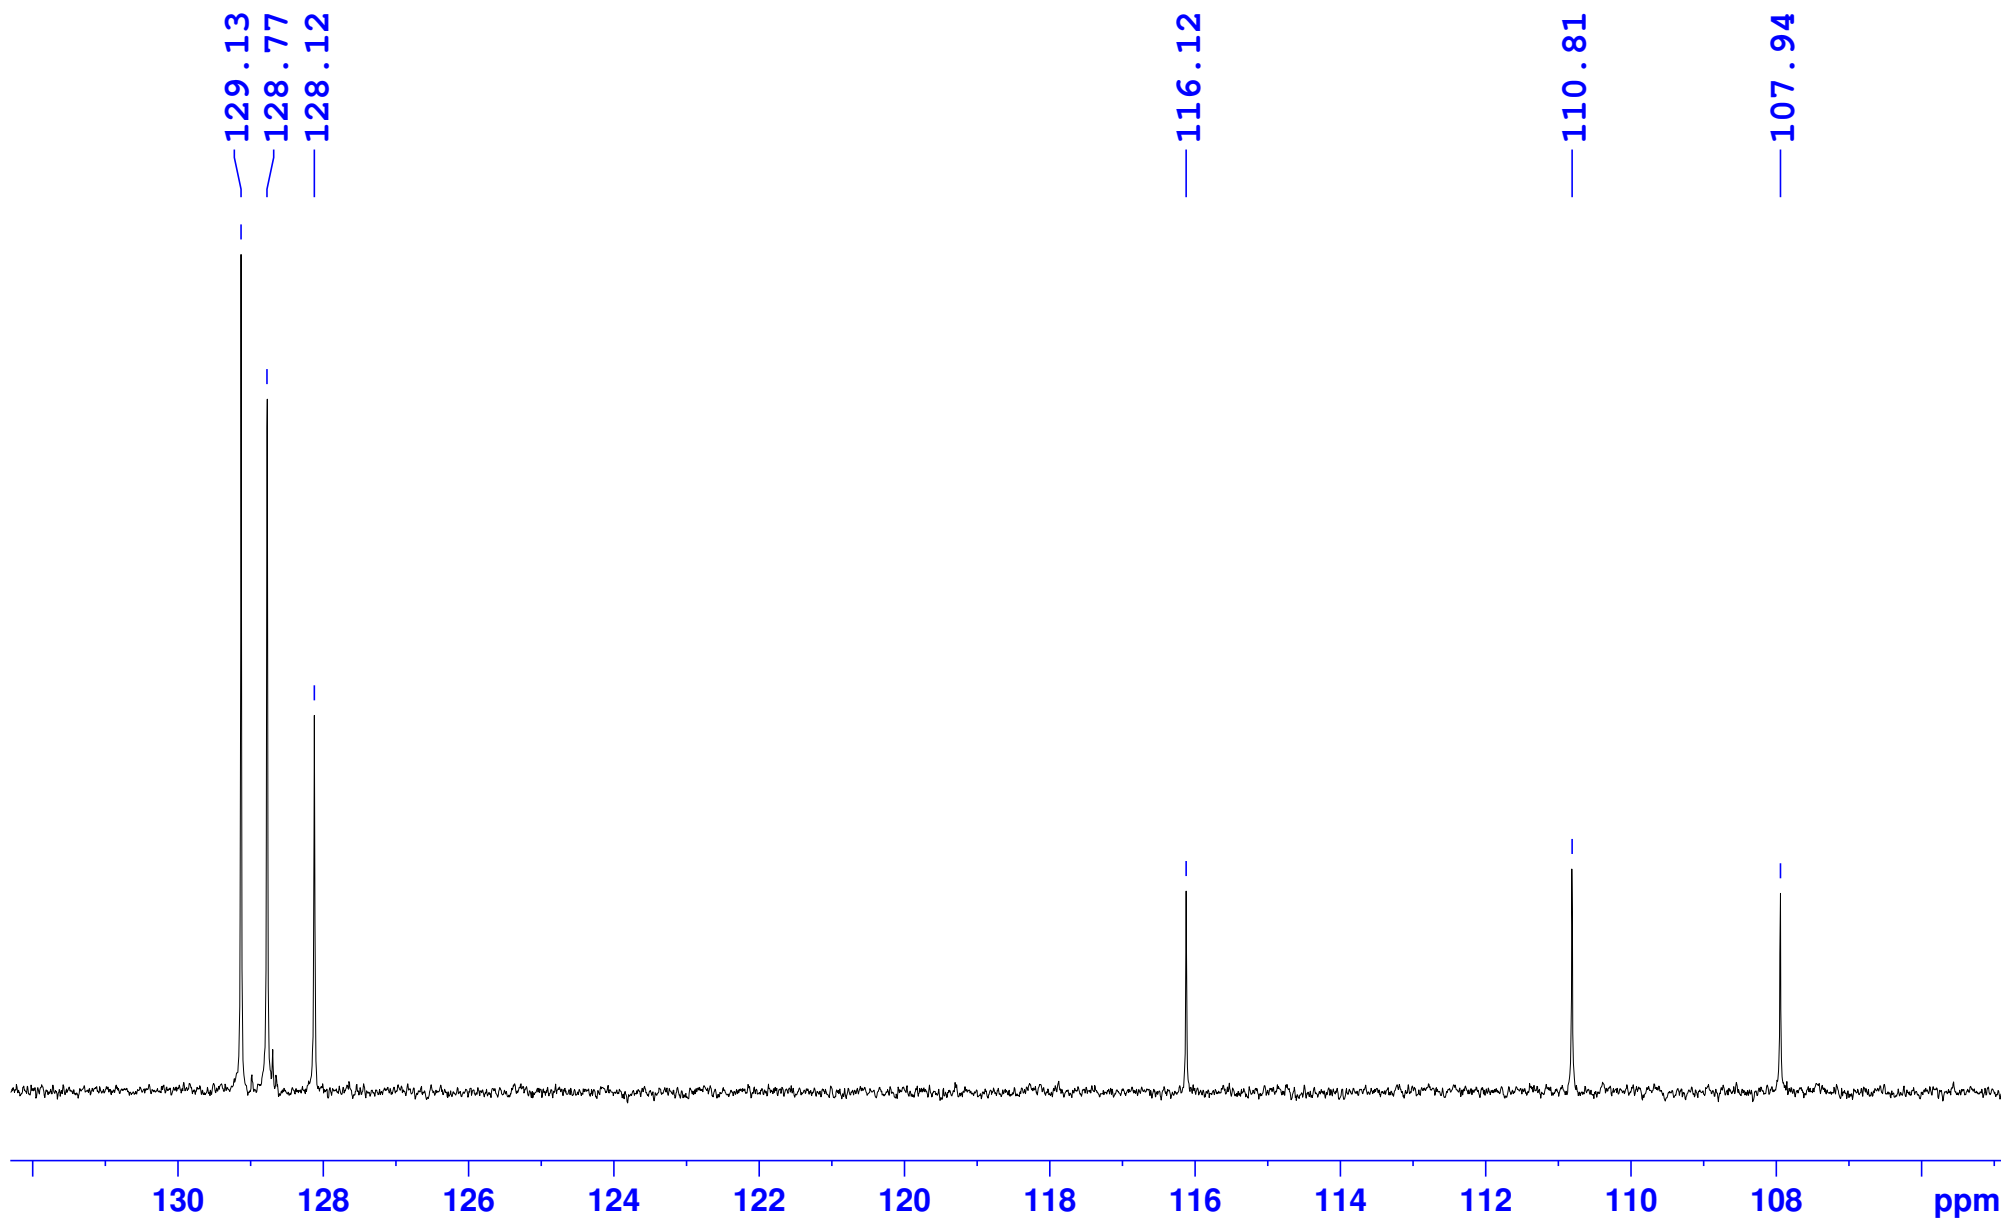

**MPT (DEPT, CDCl<sub>3</sub>, 400MHz)**

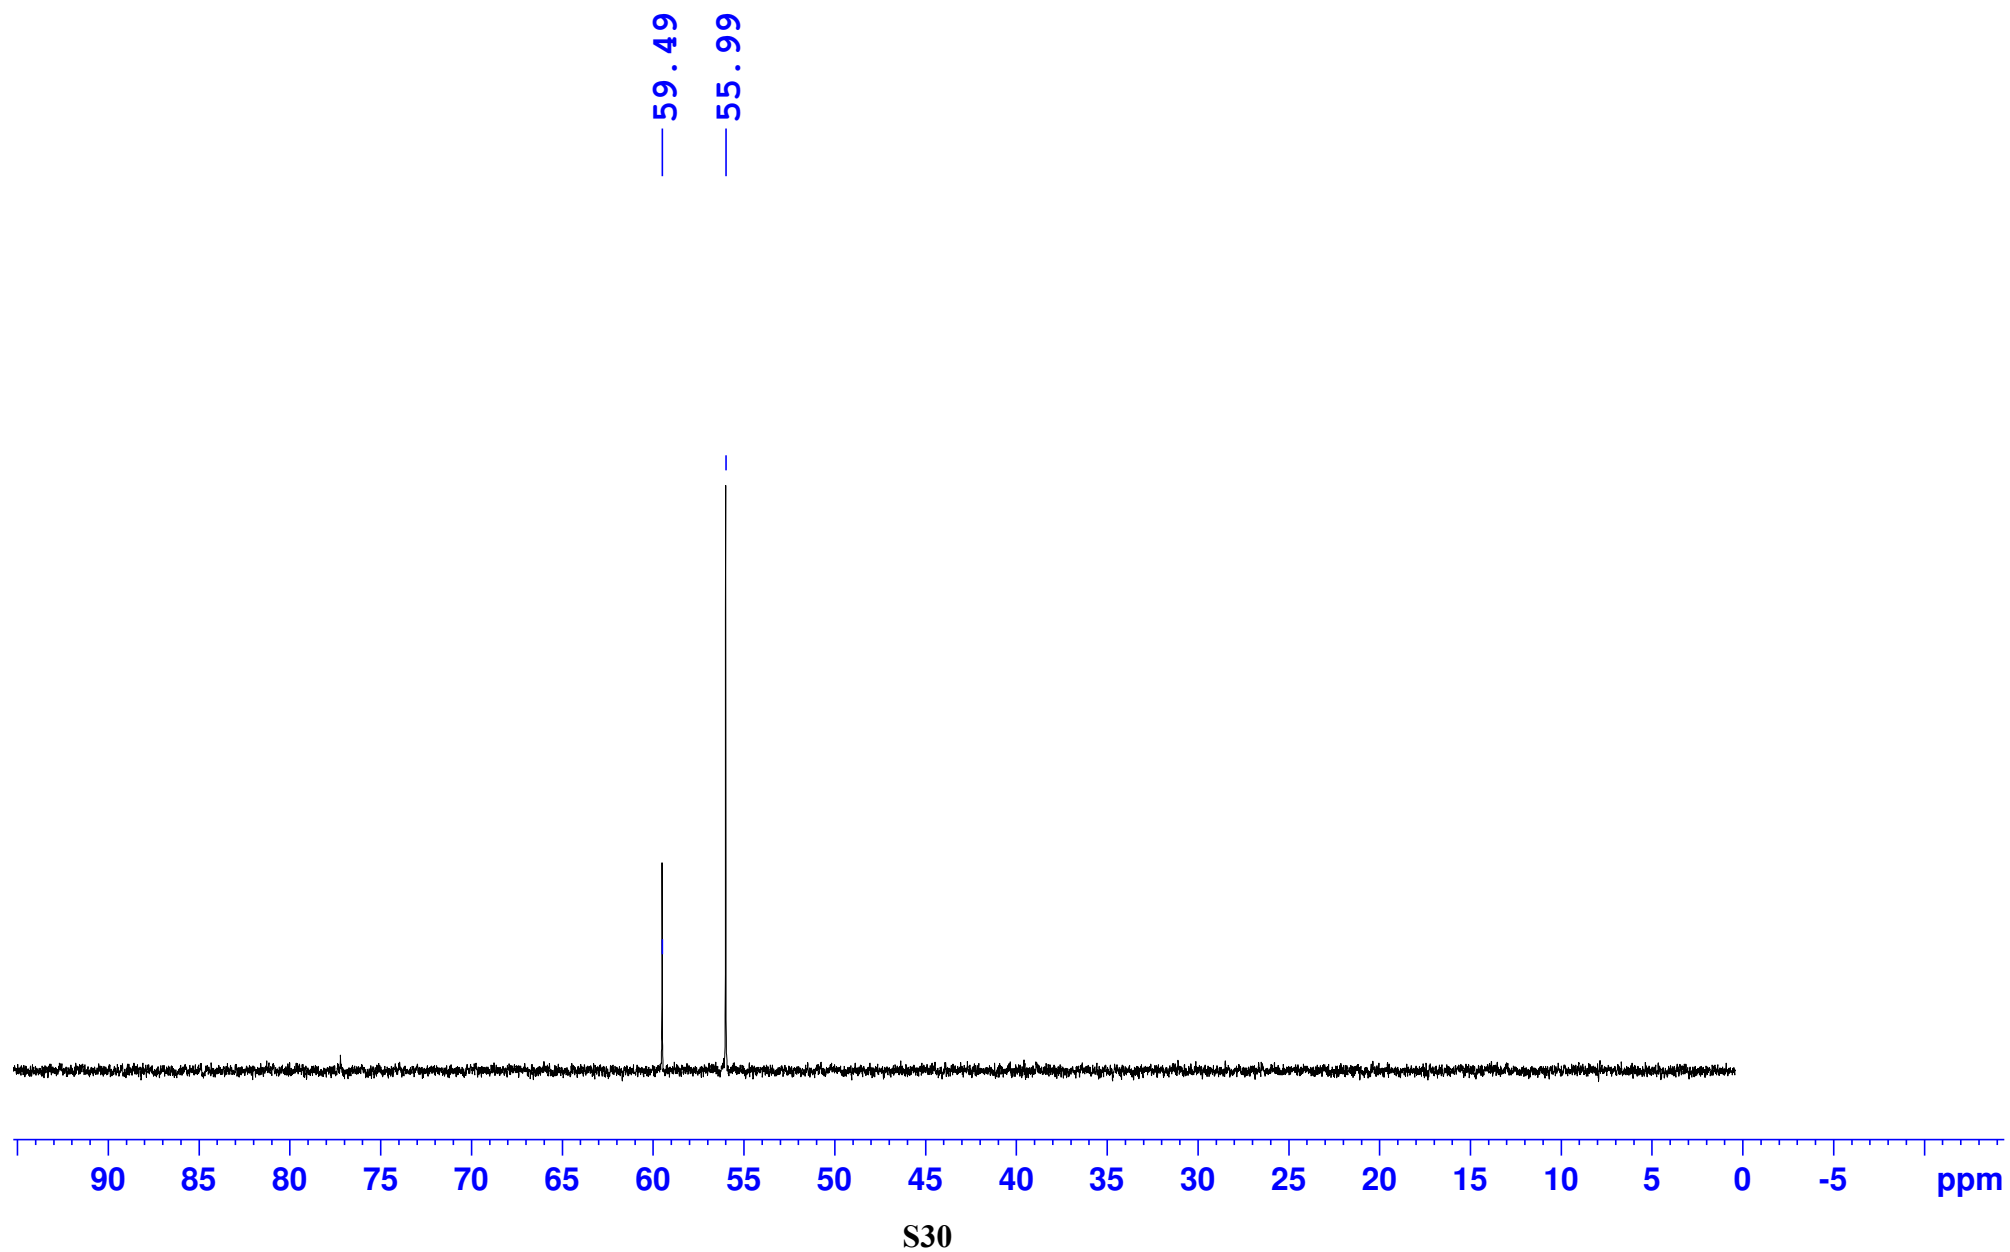

Supplement: d4ra03548h1.pdf [file d4ra03548h1.pdf]
